# Supplementary material for: A Scaffold-Level Genome Assembly of the Pirate Bug, Orius Laevigatus, and a Comparative Analysis of Insecticide Resistance-Related Gene Families with Hemipteran Crop Pests
Source: Research Square preprint supplement (doi:10.21203/rs.3.rs-537204/v1), 2021-05-27
Supplement: Supplementary file 1 [file 389be70e8e11b8227cb2b963.xlsx]

## Sheet: 1. ABCs
mRNA10019	MACTTSTEYALTIRGAYKRYGPTNVVLKGLNMTLPRGTIYGLLGPSGCGKTTLLSCIVGRVELDAGEISTSGKYKSDIGYMPQDIALYSVLSIYETFLYYGRLFDMTYAQIESRTDQLVKLLELPSANTLVENLSGGQQRRVSFAVALLHDPQLLILDEPTVGLDPLLSQSIWEHLLKLASDGKKTIIITTHYIEEARQAHIVGLMRGGVLLCEEAPNLLMTSHNCENLEQAFLQLSHKQQNACSGEEEQIVSNYPEKQNPKPHLNSEGWFLWSRFMAQLIKNWFFMWRNKAMMIFLLGLPLVQCTFYNLAIGHDPEGLKVAIVVDELNGLKECTTFPTNGCNLEIPLSCRYIDILRNRTIDLVEYDGLEAGKSAVSLHKAWGLLYFSNNYSSALAERI…
mRNA10248	MDIEFENLTFSVNRTWFNLNGKERTILKSVNGRFMAGSLSGILGPSGAGKTCLLNAISGYRSAGVNGNLRTNGQPRDKNKFRKMSCYITQEDLLVPLLTLNEVMAFAASLKLPSSYTKKQKKSVVEEIQNVLGLYECRRTATDLLSGGQKKRLSIALELINNPPVLFLDEPTSGLDNVSTTNLLKVLRTLAHQGRTIVCTIHQPSATMFMMFDQVYVLASGLCVYQGATRELVPFLSSEGFNCPTTYNPADFVIELTEKEENIKKLSKATQNGKVARFDAVKIADERNECGIDFNYSRIGDDYDKKLCARLPVSCWIQFVTLLSRMLLQLRRNKLGLQIQFGNTLLCGLAFGVLFYKMARDGNQFFSHMKFCIGIIIFHTYTMCMAPVLAYPFEVKLLK…
mRNA10681	MGDKKTEEVPSEPSTPLWEDIYLEDDGDEYFETEDASKDRKRDQGLSGPWDTPKQYIPCTGFSKYNPALKNLIPVRRKKKANNVLGLDEANLWDYLSIKWLTKYFDLAYNKGLLKVEDIPNSSPFDTCEYNVQRLETIWNEEVTRKGTQSASLGYATWRFLKTRMIISSILFTIHVALNFLAVAFFMRYLLEFTENENSSFWEGLMWTFLLAFTELVRVTLYSLVWTMNYRTSMRLRSAYLAMLYRKILRVYCLENKTVGEIVNMFANDGQRVFDLMLFAPMLIGGPVSLLLGAGYVLWTLGPWPLFGLTVMFLFYPIQYGLSRISAFFKSRSLKMTDLRVSTLTNMLSHMRFVKIYAWSDIFKDQIDDVRKKETSLVEKIAYFDSLSSSISTTVPVLS…
mRNA11048	MMREAQEEYAVRIRKAFKSYGSGSNRHVVLNNLDMNVPKGSIYGLLGASGCGKTTLLSCIVGRKHIQSGEIFSLGGTPGSRESGIPGPRVGYMPQEVGIYGEFTIWETLKFFGWINGMTTEEIEEKAKFLLDLMGFSNRDVFVKNLSGGQQRRVSMMATFIHSPELLILDEPTVGLDPILRERIWEHLVEMTRVHKTTIIITTHYIDEAKQASIIGMMRKGILLAEESPTDLAQRHGLESLEDVFLKLSYEQNTSRNSITEAQPVIHSQPVFDEIKAAEKTQLFSLSGLVKSHHLKALVWKNALWMRRNLGMLWYILLLPVLQLVLFFHGIGHDAEGLNVAILNRESPQNVLCPYNMTFCNHENISCRFLHHFARRKHNLVAYQNYEEALEAVERGWAW…
mRNA11102	MVNFYNDYENKLNKFTTYKLRMNAERLPDSHDAWSFSYANGPNHKPFQDLKLITYGFVYLQDMIEQSIIIEQTGRKDLPGVILKQFPHPCYIEDWFMASLADVFPLFMVLSWVYSASMIIKNIVHEKEQKLKETTRVLGMGNGVHWCSWFIDSIIPMIITVLMLSSILVYGGVLANADYSLVVAFLLCYAIATVTKCFLISTFFSKANLAASSGGIIFFASYLPYPFIETWYFYFTPQMKLVACLVSNVALGLGSNYFGMRELEGTGSKWNNVSSSPVIGDSFNILVVMIVMLLDSLLYFSLTWYVENVFPGVYGVPKPWNFLFKRSYWLTSTENENEILSGQKQNEYYEEEPNLKKGVSIINLCKTYSNGKLALNNLTINFYEDQISAFLGRNGAGKT…
mRNA11607	MEIQHKYRIIALEIDEAVRLRADTKQMPEIWEMQQRRYSIAGDERLPPPSRGMVPSTSEDLHAWSIYRQNLNSDFTDSALGSSEKSPLPYGNFQLRESTVQSILSHPRYGPKSPLGANMYTYLKFGLPRVFPPNAQGTSSGYNSSEEGDMRRKSRSRSEADFNNLHFHPPMPTLGGKSLSHADLLSAETLLRQSAAQHRRSLHDLRHTDYLHQALIRPHHQPRMRRVSAPQSVLTPEPFSFSMLHPQQFTGLYPHLQVRNMNVRNRKGEPMLNNLSTEVKAGEILSVMATNSFVGTCLLECLSGRHSYSGQVFINGQLVTSKELKGVTSFVDKDTVLHGDFTVSGCLRYYASLKRPQSTRGKLSMSDQVAIVTDELGLCPVLETTVANLTPSEYARLLV…
mRNA11724	MPRKGGDETDKLTRIAIVTSDKCKPKRCHQECKRSCPVVRTGKLCIEVSVNDKIAAISEALCIGCGICVKKCPFEAITIINLPSNLERDTTHRYSQNSFKLHRLPIPRPGEVLGLVGTNGIGKSTALKILAGKQKPNLGRYSSPPDWTEILNHFRGSELQNYFTKILEDDLKALIKPQYVDQIPKAVKGTVQQLLDRKDERSNQNHICKLLDLEKIRDRMIEDLSGGELQRFACAMVCIQDGDIFMFDEPSSYLDVKQRLKAALTIRSLIQPDKFIIVVEHDLSVLDYLSDFICCLYGVPGAYGVVTMPFSVREGINIFLDGFVPTENLRFREESLIFKVAESATEEEVKRMQHYEYPSMSKTMGNFKLDIDSGQFTDSEIVVLLGENGTGKTTFIRML…
mRNA11740	MDDTMIEVRDARKCFGQGLVLNGLFMRVEKNTIYGLLGPSGCGKTILLNCILGRKALDSGLIKLGISDRKQVGYMPQEVALFTEFTIKEIFYFYGRLHGLGRKNVKERVDELKNILNLPQWESRIGSLSGGEQRRVSFAVAILHDPSLLILDEPTVGVDTELSHNIWQYLLKLTNLGKTIVITTHYVEEAKQAHKIGLMRCGELLCEDTPQKVMASQNCSTLEEAFFRLSIKQKLPPEESAKVKLLQRNRTELPLQNGEMFNWNRFSAQLLKNLCWMKRNTFIMVFLLVLPAMQSFFYSVSFGQNPKNLKMSLVSGELTEKPYCRSTFVPEANEILNCTLSQPYTCHFIQQLKNFMDVKIYENLKDARESVYKNKVWGVIELNSNFSTSVINRIIEGKF…
mRNA11769	MYLSRFCFGHLSGRGGLSTLSVLRFNGGRSVNSLRLRLYSNHSGKFKPLKEIRSPNDAFIAFKRFLSSKAMMEVAAKDAALPKKSRGGELKKVFMLAKPQAWSLTGAVLLLLVSSAITISVPFALGKVIDLIYTSDKDKMKENINIVCGILLGIFIIGGICNFGRVYLMNVSAEKITKALREKVFSSIMKQEVAFFDKTKTGELINRLSADTSVVSHCVTNNISDGLRSFVMVGAGMSMMFYLSPKLALVSLCVVPPVAGMAIIYGRFIKKMTTRVQDALADATQVAEERIANIRTVKAFSKELNEIQAYTDKMNTVLSLAMKESLARGIFFGMAGLSGNAIALIVLYSGGVMVSDNNLTVGGLSAFLLYAAYIGISIGGLSSFYSELNKGLGASTRLW…
mRNA1189	MKASRNHWTSHPREDASKFSLITLTWIAKIFWSNFIQKITFEDIWKPYSRHRSAYLGERLEKQWQKQVKSQKPSLLAAIFRAFAREILILASFQLFQQLNDVLVTPWMLKRMLSYFKVDRESDLKTASLSAMGLLLSILISSILRNHYVLNACELGMKVRAACISLVYRKSLRISKGALSKISTGQVVNLVSNDVSRFDLVAITMNYLWCAPMVTIIACYILYHEVKYSGVAGIFVIFTVSLLQSFAAKLTARFRKEVAGRTDERIRLTNEVLNGIHVIKTYAWEKAFANILEWARKKELDPVYKANLMRGAYMTFSIFTNRMAVFSTILSYVLLGETLNAQTVAVITLYYEILSSTICGLFVKGLSDVAECLVSIKRIQLFLVREEIDTKGKDNEGFE…
mRNA12368	MLPSGTTSSDLHPLQNPAPDITFNNLTYTVRSSKINIFSRKRKEILHEVSGHFKSGELSAIMGPSGAGKSSLLDIISGYRKTGYTGQVLVNETEIRDSTEKYCYIMQEDNLHPLLTVREVMNLSANLKMGHPYTKNNKIQRVAKILEALGLNGNENTLTGRLSGGERKRLAIALEIIDNPPILYFDEPTSGLDSSATKQCISLLKKIARDGRIVVCTLHQPSAIIFEMVDYLYCLSEGRCCYSGSPIIMTNFLSSAGLDCPAYHNPADFLLEVCGGEYGNHNDFLVRCSENGKSHNWRKTDLEDFKPYLTSQEDGNKRISFSAIFDSTSERDEIVDRNEKSSRFNTPFWNQFFLLVHRIFLTLMRDKFHMLSRLLIHLSIGLLIGVFFFNIGNDAGRVL…
mRNA12615	MMEEYYGTFDEVDRNNDVFPLPGNIGSMAVNVMMETDEETYKINSKSKKKAKKRKKTEDDDQPSGLAGITGLFRYAQSGDYALMVVGFLASVTNGASLPVMALVFGRMTNMFVNVAMNGFKPENVNITAPTSSTMANITGNITRTDFTESMQTFAFYYVYITINVFISVFIQTLCWEMACERQVYRLRQIFFSQILRQDISWYDANEDGDLPHKLSDDLERIREGIGSKFSMLTQYGSTFVVGIMVGFHANYKLTSAMIIIAPLIIGISAVVARAMSGSAQREQLRYGIAGGIASEVLNCIKIVASFGGEPKEITRYGKALREGRKITSGKYYILSVAAALMFVVSYGAFGFAFWYGSELVKSGMATPGSVFAVFFSVMAGAFTIGNALPYVNTVSTAI…
mRNA12622	MSFKTDEDALLIHEKLIDYGTIRKKEIKKKKGLSGLFRYATKADYLFLVIGTIFALIQGASVPCLGYVFGLMTDVFLNRTEEDQIDEIIEEKYESINRNRSFKSSALESFGFETNDAIAQRDFMSDVYFFCGVYVLLGLVSFTSSYLQIYFWERVADRQLFQLRKRFFSQVLRQNIGFFETEKNGDYVSNLSDDLERIRDGIGYKLSMIVFYVAVFVSGFTLSMILNWKLTCVLLIVAPILILTSAYMAKSLSTGAVREQLKYSEASAVAEEVFTCLKTVVAYGTVDYECSRYHRSLEDGRKSAMKKYYLMSLISLFLYTIMYSSYGFGFWYGSILISENMGTVGEIFGVLFCLVSAAFSFGNILPYFNAVTLASGSSETIQEIIDRVPLIDPYSTRGL…
mRNA13069	MRPHVDIDFSELSYTAGTRRIIKNVTGSFKAGQLTALMGPSGAGKSTLMNILAGYVTKGVTGTINTNGEPRHLATFNKMSVYIMQEDLLQPHLTVRECLELAARLKLGSSYASEKIYLVVEDLLNTLSLVKCADNFTDKLSGGQRKRVSVAVELVNNPPVIFLDEPTTGLDVVTINQTIQLLRLLARQGRTVVCTIHQPSASLFQLFDRVYMIAKGKCIYQGTPANIVPYLSSTGYDCPQSHNPADFVFEILQNDAIEKFTDKIQNGKLTVGTATVVADNSEITDNIKFEISQKANYLTFPNSFWTQFTLLLSRMLLQRRRHVGALWLQVIHHIFSGVVIGGIFRAVGNDATRPFDNFKFVLCCLVFYMYTHCMTPILTYPEEVKLMKREFFNRWYSLK…
mRNA13177	MAEEQRVEEIPLETKTLTYTRLPATEPVEIRFQDLQYRASLGFRKGTKEILHNVHGRFLPAQLIAIMGPSGAGKSTLLDVLSGYRITGVRGAVTVNGRERDLNEFRRVSCYITQDDRLQPLLTVQENMKVAADLKLTAKYNEVEKYAIIDEILKMLGLHEASMTRAARLSGGQKKRLSIALELVNNPLVMFLDEPTTGLDSASCLLCIKLMKLLVSQGRTVVCTIHQPSASLFQNFDHVYVLAEGECLYQGSAEKLVPYLEYIKLPCPKYHNPADYVIELACGEHGRDKIKEMVNGTQNGRSTTFFENAENLPPTTHVEVSHKSPRLPGSIRCTSSLQETSQFNQLSVIIKRGFLKVKRDSTLTYMRIVANLVTGIMLGLLYFNSGVDGARVLDNYNLL…
mRNA13180	MIKYETGQESASGINMEHFPRRPPVNIAFKNLCHEVYVWNKIKPAKKIILRNLSGEFRSGELTVIMGPSGAGKSSLLNVLAGYSVRGSSGEVIINGESRAKIGLEQFKKVSCYIQQDDVVRPLLTVHESMALATHLKLGCSISHNEKKNKIAELLDMLGLTQHAETLSGRLSGGQRKRLSIALELITNPPVIFLDEPTTGLDSSSSSACVSMMKLLSRQGRTIICTLHQPSALLFEQFSQLYCVAEGMNIYQGTPSDMLSYLADFGLVCPPYHNPADFLIEVAAGDYPRDLKAMSESAKKSLPLIQSKDKVMETEKGLELYQVASKHSKADGSDSDLGAVRCLPKPASPLLQLFHLYNRNVLVLRRDILNIVLRFVAHLFISVVFGYLYQSVGNDADAL…
mRNA13460	MSFKEGSLPRPRPKQLLTQQSTVWTRRQNAVCVRRARKTYGPKNNQHIILDNLSMTVPKGVIYGLLGASGCGKTTLLSCIVGRRSLNSGEIWVLGGRPGSRGSGVPGPRIGYMPQELALYGEFTILETMMYFGWIAGMKTKDIEIRTDFLLNLLALPDRDRFVKSLSGGQQRRVSMAATFLHEPELLILDEPTVGVDPILRQSVWDYLVELTTLKGTTIIITTHYIDETKQATTIGLMRGGRFLAEESPAELLRRYHSESLEDAFLKLSIVQNRFKRRRSSIISDVVAANAPAIPELRETNIGVANEAFESQSEISGEFGDNMSMSNVNVPTQQPVYADPLPPEEEVRFSWKDIFTIYKGNHMKALVWKNLLWLLRNVGAMCFIFLMPTLQIGIFCLSI…
mRNA13637	MNGQPTLKSDDESAVLVRNAYKRYGPKSVILSGLNMTVKKGSIYGLLGPSGCGKTTLLNCVVGVKRLDSGSITLAAKERTQVGYMPQEISLNEECTIKEVYHFYGKLYGITEKKIEEMDNHLSSLLELPPSSRMISTCSGGQKRRVSMAVTLLHNPNFFILDEPTVGVDPVLSNKIWEYFTGLVEEKGITLIVTTHYIEEARFADRIGLMRKGVMVAEDSPGALLKTFNSETLEGVFFEISYKQDAEKEETKSYPKLNPNDPPFSQNEKFKFQRFRAHFTKNLNWTKRNFTVTAFVILLPAVLFAIVTQLNSSEGYPRGLKPYVYVNEEADCDNTTKKVLKKPCEPSYPLSCRFLTKIRPFYSLYEVANVNKGMEEVRKGRAGGVIRFNRNFSIHLMGR…
mRNA13663	MSFFRFYLGFSHSQNWRRFFDPAKSLVRNEWRKRLVGDKKNVDVFRRPILKSFVLFGLGSGSQLLLKDKFVYCEAKLATPIVFKEEDTNLSWRIILKLLLEDIINILIAVSAAFAVAFLNIKIPLHLGDIVNVIIELIKHGGKDFSLAQNLKAPMLKLIALYVLQACGTFVYISVLSNVGEALAAKMKLKLYSSLIKQDIAFFDTVRSGAMIDCLTSDVQEFKSAFKLCISQGLRNVAQISGCVVSLYIISPTMTLGVMGIVPVIILCGTACGNVLRALSKKAHDQTVKATSMFEETLTNVRTVKAFSNEDIECEKLKDVLHEAHKLNVTLGFGIGMFQGATNLFLNGLVLGTLCMGGHLMIQQDLTAGNLMSFLVAVQTIQKSFAQMSLLYGLIAKGK…
mRNA13792	MEDFTEYKEKMGFAGGFSLMKFPQLPPTLKLRQMRDDARRLFAGHTLRCVFSLFFLFVHLAEFGELLAGGKSWMLALLSCSSWICVQFFYYTIEKFGRAHYLGVTSLLYLASGLARGVLLYTLLEEIDMTYVSTNLAAVSSALSYAVSLNDLVTLINEIKLEKHERKLPIGEYESYVHDQSHWFSKVTFFWLTPLLRIGYANPIEPEDLGKLPAKESTSVQYQRFLEIYRKTKNEDGPSLWKCYFRCYWKNFFIGGVLKLIGDFVGMIAPLGIAIVIDYVASQKHPNNSTEDFVSLEAFLNNGYVMAIIIFVSALAQASFSQASTHVINVEGIRLKTALQGMIYAKTLKLSISNKDDDSSSSESKHGTTTNLMSEDTFNVMTCMWIGHYTWAIPLKITV…
mRNA14059	MHPDKDLTTWQTFRRLWPMIAPYKTGLIVSAIALVINAAGDALLLSLLKPLLDKGFGKANNTVLMWMPLVVIGLMLMRGITSYISSYCLSWVSGNVVMTMRRRLFGHMMSMPVSFFDQQSTGTLLSRITYDSEQVASSSSGTLVTVLAAVADSDSAGTGGVAGHSVTTSAEQMLKGHKEVLIFGGQDVENRRFEKVSNRMRQQGMKLVSASSISDPIIQLIASLALAFVLYAASFPEVMETLTPGTITVVFASMLALMRPLKSLTNVNAQFQRGMAACQTLFAILDGEQEVDSGQRVIERAQGDVEFKNVTFTYPGRDAPALHNISLNIPKGKTLALVGRSGSGKSTIASLLTRFYDIQQGEILIDGHDLREYTLGSLRNQVALVSQNVHLFNDTIANN…
mRNA14083	MPISEINDLFSRILPGIGIKTSAFNRGLICQTGYVMSKEQYLTLNKASGPNSNSRTEPFVKVIACIATLGGLLFGYDTGVISGALLFMGPELHLTPFTMGLVTSSLLFGAAFGALFSGYFAAVAGRKKIITLLAVIFAVGALGTALAPDVHWMVFFRLLLGVAVGGASATVPVYIAEIAPANRRGQLVTMQEFMIVSGQLLAYMSNAGFNALWGGADTWRWMLAVATLPAVMLWIGMLFMPDSPRWYAMKGRLAEARKVLERTRARDDVEWELTEIEETLQDDELQGKPRLRELKKPWLFKLFLIGIGVAVIQQTSGVNTIMYYAPTMLTSIGMSDNAALVATIANGVISVLMTFVGIWLLGRIGRRPMVMIGQFGCTCCLLFIGCICYFMPEAGGVVA…
mRNA14349	MLYCKPNISIYDIWVDHGVSDCFMSTVSNSILALHLFIFGSAQLWIYRKHGTRVVHLESPSKLYILQLLFSALLTILPIFNLAFQVVSLNKGNLYGYQILSAFLQFIVYPYSILLIFVERNYLLPSSPPRGHGLILLVFWTLMFISVNSLFINIHREDWWTHLESWKDKLQLALFCTRYVLSLFIFALGFKAPGIKPLRDYIETASFSRFGENQEEDLSYSTWYNVWKKLKILGPFLWPKKDAWLQIRVIFCFMLLAVGRVINLYVPLYSKYIVNSIKVPNAVFRWDLVLIYVGFKFLQGGGTGGMGILNNLRSFLWIRVQQYTTREIEVELFQHLHGLSLRWHLSRKTGEVLRVMDRGTDSINNLLTYILFNILPTVVDIIVAVVYFVVAFNPYFGLI…
mRNA1447	MGPSGCGKTTLLNCLAGRVKLDGGNIRLNRERMSKRWKRRICYVLQQDVFFPDLTLRQTLEYAALLRLPDTLTYSQKMQYVDHIIDVLDLNNCQDTIIGDYIKRGLSGGEKKRANIACELLTNPSLMLLDEPTSGLDSHSAYSLMCCLKRYAEKEGKTVVVTVHQPSSQIFHMFDKLLLLCNGQTAYFGDTHRVVDFFNGIGLTVVPHYNPADFILEQVKGSDEMKEKIISASREARLRPDYPQELLPEYFGPNNVCDKYLNNYNDPQINSNGHVGKCQCTQEMWTRNGNSQHNQDPVCMTVALGETNESHSPVYTTIAVKEEEGKTLWLDNQSHASSSVSCSDDDVSWQWPTTFWTQFKVLSQRNFQEARPRMLSKLNWVQTIALGIMAGLLWFQLQR…
mRNA1463	MNGEHLGTITEGENEEEKKPKRGLTLSWHNLSVWVEKKDEDKSTWFTTRYYDCKILRKVSGIAEPGRLMAIMGPSGAGKTTLLATISKRLKGGIKGRVLVNGKEIDKDLMLKVSGFVPQHDLAMETLTVYEHLQLMARLKLDRNLTKNERTLRILAMISELGMIDVKNSRISMLSGGEKKRLSMAVQLLTDPPILFCDEPTTGLDSFSAFSIIEQLRRISATGKAIVCTIHQPASGLFELFDDIYFLVAGGRVALNCQVSEAADYLQNVGIVCPPTYNFAEFLVSQLAIGEDAESQIRVNKACRYYRESKHYESLLKRLEDENSYGKTIIIEETMNKSTDSLCEPSTDFGKYIAIKGPKKSTQLSWLLWRSSLEIIRKPQMYILRLALYLFLGFVISIP…
mRNA14721	MGSVLEVQPGQSVAIVGESGSGKSTIINLLLRYYDAIEGNVEFDGVNIKDLNLKWLRKRIGVVSQEPVLFGVTVADNISYGAEDVTMEEIINAAKLAHAHEFILGLTNGYYTNVGELGGQLSGGQKQRIAIARAIIRDPTFLVLDEATSALDTESESLVRSALNEAMKGRTTLIIAHRLSTIKNSDMIYVMDKGIIAEKGTHQELMALDGHYSRYVAIQTDENDQLPSEGQHINPLVLSPKKNSCDDTQTEKASEKSIGMIRSLLRLGKLNLPEWHWLLIGFCACFLFGAIPPLFAYLYSEMISIYEQEGEKFTEGIKHFSSMFVFLGIFCGLTFSTKVMSMVTAAEYLVARLRYLSFRNIIRQELSWFDLEENSFSVLLTKLSRDAPLVKAAAGLRAG…
mRNA14938	MIRREKTPVVTIRNAYKRYSPKAVILAGLNMTIRKGTIYGLLGPSGCGKTTMLSCIVGRQTFDSGQIYVEFSRKRQVGYMPQDINLSGDLSIMEALVFYGRIYLMEIDEIYSKANDLISFLELPPKNRIVKNCSGGQQRRISMAVTLIHDPDFLILDEPTVGLDPVLCEKIMKFLVHLVEERDKTIVITTHYIEEARNSNTIGLMRGGILLAEESPQELMKRFNCEHLEDVFLILSAKQDSDNDKNLLPYPPINKPSTPFESKEIFNYKRFKTQLDKNLTWTKRNWAITLFVCFVPTLTMYLCCVNDIKSMVTSPIGTVIPEDLLCSSNFTKIRPCLPENVDFACRYVQILDKSYPVIVYQSIDTAYIDAKKGSLTGVVEIKRNFTQNIMTRLEKQTDA…
mRNA15028	MGAEDYMVQVVGAYKRYGYGQPVLAGLNMNVKKGTIYSLLGPSGCGKTTLLSCIVSRVHLDDGHIKLGIKKKSDIGFMPQEIALFPECSIKEIFSFYGTLYGMHPYEVKKRRNELMEMLNLPPPHRFLHTLSGGQQRRVSFAVALLHNPPLLILDEPTVGMDPILCNTIWEYLVKIANENKITIIITTHYIEEAKPSHMIGLMRKGVLLTEEPPRRLMERTDCDNLEEAFLALSTKQSEQHKLEKHFGSPVPYPKVKPNSAPLPIQNNDWFNYHRFIAQLQKNIRWTHRNKSVILFLLLLPAFISFMFCLCFGHDPKPEDLPIGFVSDELSYFDGDCASLNQNYTYSSLLECNISYLLSCEFINRLNETLNVKLYDDMDLARLDVSTNKIWGVLQVSKN…
mRNA1853	MESTRKHWTAHPRESASIFSLLFFTWVTKIFWTDYKKRITEENIWGPFGEHKSNLLGDRLEKQWKKQVEKKNKKPSLLLALIFTFWKEFFFLGIIQLASQLIDVLLRPRLLGLLISYFNVVGGADLNTALYAGGGLLTTALITSLCSNHYLMNAFTIGMKMRAACVSLVYRKSLVISKAALGKVSAGQVVNLVSNDVSRFDMVAITFHFLWCSPLTAIIISYFLYEEVGYAGFAGMAIVFTVAPLQTYTAKLTTQFRRKIASKADERIRITDEVLGGIHVIKMFAWEKAFYNLLEWARDAEMKFVKYANFLRGAFMTFNLFTTRMAVFCTLVTYALSGQTLNAGKVFVIAAYFGMMSATMCSIFVRGVAEVAEGYVSIKRLEKYMLNDEIDPQENVKKE…
mRNA2283	MIVFSSLQIRRGVRVLLENATATINPGQKVGLVGKNGCGSASWPGTWSLAWVNQETPALEQTAIDYVIDGDREFRQLESALHDANHRNDGNAIALIHGQLDAINAWSIRARAASLLSGLGFVQQQITHPVSAFSGGWRMRLNLAQALLCRSDLLLLDEPTNHLDLDAVIWLERWLKSYSGTLILISHDRDFLDPVVDKILHIEQQNLFEYTGNYSVFEIQRATKLAQQQAMYQSQQQKVAHLQSYIDRFRAKASKAKQAQSRIKMLERMEMIAPAHADNPFHFSFRPPENLPNPLLKMEKVSAGYGERTVLNAIKLNLVPGSRIGLLGRNGAGKSTLIKLLAGELAAQQGDVGLAKGVKLGYFAQHQLEFLRPDESPLQHLARLAPNVTEQQLRDYLGG…
mRNA2348	MQTGNALRDSVVQTVDALWHVLIYAVTTLVLFAQADWRLMLPLILWITGYVLCMWYFVPRVKARSVASSEAHSRLMGTIVDGYTNITTLKLFAHGTLEKHYAREAIEEQTDKSRRAGRMISGMDVTITTLNGCLIVSTTGLALWLWTQSLISVGAIALATSLVIGIVNMSGWIMWVVNGIFEDIGMVQDGLKTIAQPVKVSDQPQAKPLQVARGEIRFTHVQFNYGGTRPVIEGLNLTIQPGEKIGLIGPSGAGKSTLVNLLLRLYDLNGGTIEIDGQDIAQVSQESLRAQIGMITQDTSLLHRSIRDNLLYGRPDASVDALDQAIRRARADEFIPLLCDEQGRSGLDAHAAYCYCPGVTKRCADSGYGRSHVGAGLGSRSGDPGKSGRSDARKNGYRH…
mRNA2392	MSDSHLYKALAWKLLWSYRRKKILLFLTTIFAVLLSSITFYAGPYSATEFMEKISIPITPEQLMSVNQKTDIKYAPKSMETKKIMKEVGRMLKKSSLKSLSSTEEVEKEFIEEKNQKNENETENNFSYGVIFEHVSKNELKYSLRSTLGKGWETKKLTRINEDPNEVKDVYFLRNFVALQNAINSGYLTFLGVKGKKWYLQEFPYPKQVLRDKFTTEFTKTFTYGVTPLYYCMIKFIMDEKSSGARDIMILNGFKLHFIYFYWIIFFMIPFLIVITTAMIMAVIFENLYYSSAFLFWLLLFVFLISSMAMIFALTAIFKNTTFAMLFYFIPLAGVINLLHYTTYTTLSFKGILTVVTPGGSLVQGIEMIAFYESAGVGITFDNILTVNKSLRHGPYLCI…
mRNA2673	MEGNDDGLYHFCGSKYWDSNLTWNTTSPDLTPCFMKTLAIWVPFLYVVIFIAIDIISIATSKTGNIPWNKFNIGKLILSSAIIIVGAIDLIYVIVNTGDGVVFPVDLYTSLIKIILMIFCIALVITHRIKGIRSSGLIFFMWAFLVIFGIPLLISTIKKFVNEVDYNLLDVTFIVYYAFTILSFLFNFFADAEPQYSEYPSVEKPCPEYSSSFPSRLFFSWFDSFAWLGFKKPLDNNDLWSMNFEDMASEVVPKFDKYWNKAVEKNQKKAEYQKSAAFEKSTQAVEVVGVGKNTVKPSSILPCLCLCFGPSFLVGTVVKFAQDTLTFISPQILKLLITFVEDRDEPQWRGYVYASTLLLTATIQTLLLSQYFKQMMLIGLRIRTALISTIYRKALRLSN…
mRNA2723	MHRVGKVVPPKRHILKNISLSFFPGAKIGVLGLNGAGKSTLLRIMAGIDKDIEGEARPQPGIKIGYLPQEPKLNPAHSVRESVEEAVADVVNALKRLDEVYALYAEPEADFDKLAAEQGKLEEIIQAHDGHNLNNQLERAADALRLPDWEAKIENLSGGERRRVAICRLLLEKPDMLLLDEPTNHLDAESVGWLERFLHDFEGTVVAITHDRYFLDNVAGWILELDRGEGIPWEGNYSSWLEQKDQRLAQEASAEAARRKSIEKELEWVRQGAKGRQSKGKARLARFEELNSTDYQKRNETNELFIPPGPRLGDKVVEVQGLSKSYGDRLLIDNLTFSLPKGAIVGIIGPNGAGKSTLFRMLSGQEQPDSGSIELGDTVKLASVDQFRDAMDDKKTVWE…
mRNA3140	MLHETQLINPKSLNEDFYPVQVPSKESLLRLSPERSTVTLTWKDVEVFVKIKTFKYFRYKTSLKQVIYNVSGTIHPGQLVALMGPSGSGKSTLLAALAYRYQGGTVVKGDVRINGKMVDKRFRNISGFMFQDDFFLKELTVREHLMFMARFKMNRNTTEKEKTDRVEGLIDAFALGHVQHRKIGGKAQEGEKTVLSGGEKRRLALATAMINFPKIIFADEPTTGLDSFNAHRVVKTMKTLSESIGSPVLCSIHQPIPETLALFDKVILFAEGRLMFAGKVQEAVEFYRSCGFIEDQFMSHAEFIIKCISPPQGVSISEDKTIELEEKFLNSKYYKKFKKQVDADDYDKTDLVYQDYDRQWWITKFCLLIWRTFLIDVRAPEDQWLAIFQKVILGIVCGL…
mRNA39	MPSDAKKKAAAKKKEAAKARQSTGQKKPQKPGENGEKESSPNSSETPNGNVELSAEEALCLKLEADARLNAEARSCTGSLAVHPRSRDVKFDNFSITFHGSELLQDTKLELNCGRRYGVIGLNGSGKSSLLAVLGNREVPIPDHIDIFYLTREMPASDKSALECVMEVDEERVRLEELAESLVACEDDESQEQLMDIYERLDELSADTAAARAGNILHGLGFTKEMQAKKTKDFSGGWRMRIALARALYVKPHLLLLDEPTNHLDLDACVWLEEELKTYKRILVIISHSQDFMNGICTNIIHLNKKRLKYYTGNYDAFVRTRLELLENQMKQYNWEQDQIAHMKNYIARFGHGSAKLARQAQSKEKTLAKMVAQGLTEKVTSDKIVTFYFPSCGTIPPP…
mRNA4213	MAFCLQLRLLMWKNLLYRRRQKLRLCVELIWPLFMFVVLAWIRSSGLKIKLDNCYYTEKAMPSAGVIPYVHGFFCNFNNTCEHNENDSHVRLGKLFQEGGADLLFQRLNEVVNNHTSSQSLSLSDHIENVSDNLTQILNILNSKSNQTENFQRAELQMSLENVVFGYKNIRKHIEMFSEEINKEGDEDDQLLWMREILGILKEFICNDTFDYDAVLADDLDDESFDSFGDDLLQFAINRQAGQFSPPTKECLTIMQNIESHKKLNLVWRILKPLFVGKIIFTPVTKVTQNIMNRVNDNFKIIKLLQPLADIVPNMNKTMNRTQRSITSQNIKQIHDLMNSKNVTDQHKHTIKKLIKIFKKLENGGAYFRMKSFSDDKGKSIDVRPKDLLNCLEANKTEG…
mRNA4461	MGDSASEDDRPRSRTAWESGVENGQSPPSVAVQVETDQTQEEPNESDESQTREGGVVNPALSLDEGPDVVTVDSQKEKPKLEHQTSTVWTRRQQAVSVRHAFKHYGSSKAPNHVLQNLNMTVGKGTIGCGKTTLLSCIVGRRRLNTGEIYVLGGKPGTKGSGVPGKRVGYMPQEIALYGEFSIKETMMYFGWIFGMETPEINDRLQFLLSFLDLPSESRLVKNLSGGQQRRVSFAVALMHDPELRLYLPPTWFGVK
mRNA4576	MRDGHLYRALRWKLVWSYKRKWFPILVCTLIPILLALLLAWTFTKLPPKIDQNATKPTPLGSDYISSLKSMSVGYSPENDATKAIMDELRKKISNGTIKSGNNEREVEKSLSKGKKGENEKFGIVFKEASKSRLSYSLRSTESGWFTTKRFKFSQSPPSASSKYFSRGFIALQSSINSAYLKYLGVKEEKFSMQEFPYPAYAIYPGYVVANALLMVFIILGLFPLMFYLMNNVLKEKTTGAKELMILNGLKLYLIYAYWIVFFMILFIIAISVMVVLFKIKISDVAINSDGFLLWLLLILYAFASITLIFVFCSFLSNFSFASTGFLLLTMVIYIASTVLKPETISFVGIISIFIPIGALYHGLELILAYESTGDGFGFSDIVSTNNGYGPYLLIIFAL…
mRNA5153	MQKEQEYGTKKNRRAQANPLSALTFSWTLPIFWEGFKRDLLVEDLPEPLHEHKSTDLGDKLESIWNAEYKKCEGKNQSPSFWKALFNLFGWKLIFYGIFEASAELGARVAQPLLLGRLIRFFTPGSNISKDEAYMYALGLILSTAYVILVTHPYLMAMLHIGMKIRVAVCSLLYRKALKLSKSSMSKTTVGKLVNLMSNDVSRFEFVFLFLHMLWIGPTQTIMVAYFLWNEVEWSALIGLACLLSFIPFQAFLGRKLSTYRLKTANRTDERVRLMNEIISGIQVIKMYTWEKPFANLVAQARKKEIKYIAESSYIKGSFITFVLFHARASIFCSVIAYVLSGNKITAEKVFVLTSFYNTLQTMTFFFPLAVSHLSEGIISVQRIKEFLLLDEFSEEKVS…
mRNA520	MATYLFFTGVHLKKNVTKLLKENKKFVYSMRFSQNEHRNYSSISPSALLHSKALLFDFYDDGSRKKCFLVSRGFKTKNVSIPPAQKKRDCFHPGTQSLAREAVSVGETKPVSNKEMIKLMVSYIWPKNDPKVKATVSLALSLLIGSKLLNVATPFFFKFIIDDLNTYTGLLKMGTAPEVIATSAASLVIGYGIARAGAAGLGELRNAVFARVAQSSIRNVARNVFSHLHQQDLAFHLSRRTGALSKAIDRGSRGINFALSAMVFNVVPTLFELTLVSTILAYKCGLPLGLISIGCVGLYGVFTLSITQWRTKFRVQMNEAENDAGNKAVDSLINYETVKYFNNEEHEVKRYDKALARYQEASLKTTTSLALLNFGQNTIFSGALALAMYLVADGVMQGT…
mRNA5803	MANFSKYMTKQNAIAATSVSVLLLLLKKKLNAKKRTNRKKPQQPELVEYVIGEKSTEQKIKAHVDRNFFRQLRVLLKIGVPGLLSPEAGFLLLVASSLGARTLCDIWMIRNATAIENAIVTMNKPLFKRYLLQFFMAMPMIAFVNNLLKWGLGELKIRLRTRITHHLYDEYLKNFTYYKMANLDNRIANADQLLTTDVDKFCDMLTDFYSNMCKPLLDMFIYVYRLTTNLGGSVPSIMLGYFVFGGTLLTYLRRPAGRMTVQEQKLEGEYRYINSRLITHSEEIAFYGGNNREKLTILASFQKLIAHMRKFLEFRVFMGTLDNILGKYFGTVIGFLAVSMPFMNENHHLLSSKTKEARFMEYYTMGRMMVKMAESIGRMVLALRDLNRLAGLTARVSQL…
mRNA6311	MQTNHEYGTKKNRRARANPLSAATFCWTLPIFWQGFKRDLLVEDLAEPLKEHESTNLGNKLESAWNAEVERCKGKNKNPSLNKVLFKVFGWKLLFYGVFIASSELGARIAQPLLLGRLIGFFTPGSKTTLEESYWYAVGVILCTAYTIFVTHPYMMAIMHIGMKMRVAACSLMYRKALKLSKTSIGKTTVGKIVNLMSNDVNRFDFAFLFIHMLWIGPSQTIIVTYFMWNEVNWAALIGLTSLLIFIPFQAFLGKKVSSYRLKTAARTDERVRLMNEIISGIQVIKMYTWEKPFANLVSEARKKELKYIAESSYIKGILLSFILFHTRTSIFCTVIAYVLSGEQITAEKVFVLASFYNTLRQTMTVFFPLAITQISEGRISIKRIREFLLLDEFSSEKF…
mRNA6757	MSNKHLHRALFWKFIWSYKRKTLFMILFTFIPIFGIYIYGKILNKGVLVKHFNETITHPQTPEDILKSSYVMTDIMYTPEGNATKFIMESVRKKLKHSSLTSLQNEEEVEKRIVEEYKKIQDKKIYIENLTYGVIFQTVTKHKFHYSLRSTEGRVWHTDERYPRRQTPGPMDAGRYYFRLNFIALQIAINSAYLEYLGVAEKNWSLQEFPYPDYAERKPLDEQIFSYIVAFLLYVLLFYMLANIADEKKSGARAIMLLNGVKLHQIYVYWIIFFFLPTLIAITFMTILAVQYEIINYTSPFLFWLLLFINAITSMALIFALSSLLNPTFAQLAFLFPQMIIMILIFALNFKTVSPLGILTAFVPAGSLAQGIGTIAFYEHLGVGLQFRDMTTIIKASRF…
mRNA6762	METVKKKLKHSSVKSLKDEEEVENEILKEYKRREEKSDEKLTYGVIFHAVTKRNCEYTLRSTEGKDWGMGKQYPDVKSAGPMDAGEHYFRRNFIALQIAINYGYLDYLGVAEKNWSLQEFPYPKYVDRKGFDPFILTFIACGSLCPLLLNMVDKVADEKLSGARAMMLLNGVKLHLLYFYWGAFFLILLIIAIALMTLATFQTKLISDPMSLSFFIVVLIYAITSMTLIFALTSLLRATFAQLGFLLYQSVIIFIIFQKSFKTMSPPGILTALTPAGSLAQGIGMIAFYEKSGFTLQLKDAAKINKEGRFSPYLLIILAPLVPMVLLMLLSVYMEMVKPGEYGRAKPWYFILPESLTERLNRQNKTPAQFIRSPVVLVEEKMENEGEIRVQNLRKVFKK…
mRNA7497	MDSRSQSFEKKPHPREKANIFSILTFCWTLPTFVKGWKKKLTNDDFRHPLGKHRSSILRPKLAKLWDEEIKFSEKNKTRPSLLRAFRKMFGLELFFYGLLITLSETFRLFQPLILGGLIDSISSEDPDKMKSASIFTSGLILSSVATAFLSHSYYFGVGQLGMKMRISTCSLIYNKVLLLRHINVGDLTTGHIINLMSNDAIRFDVAATFFHDLWIGPVQTLIITYFLYRIAGVSAFIGVAAILVFIPFQLWFGKWTSSLRLKAAKSSDYRIGLMGEIVKGIQVVKMHAWEKPFEALVSNARRKELNVIKTMSRIKGAINSFSMYHTRVATSLTIITFVLMGGTINAKNVFTITCFFNVLSTTATLSFPMGITIFSEFLMSVRRVQEFLLEDSDCVKLS…
mRNA7515	MTIVLMDFKSESWIGILTVLTPFGSMAQGIYLFSFYERTGVGLQFDDVAKRSSSRFGPYLLIILAPLILMVLMIFISIYLSLVRPGEYGRAKPWHFILPQCISKFFVPKNPEESSGPKPVVEPVKTKAEIRVRNLYKVFGSFKAVNNLSVDFPGDQITALLGHNGAGKTTFLYTITGILSPTSGHIYYKDYDVLLNFNKFRYSFGFCPQHDIVIQDLSVKEQVLFFGMVKKMSKKASQSYIERLFNKLGMSDKQNVLPKKLSGGMKRKLCLAIAIVNNPPVIFLDEPSSGLDPESRRNLWDIILELRKGRTIVITTHFMEEADVLGDRIAIMANGELRCFGSPIFLKKHFGFGHTISINYKSDPDKIKNLVNSFVQATSEVNTNMKQITFNVPMEETPN…
mRNA7566	MEAHILRALLWKLWRSSRRTYIKIPLFMLVPILIAVALTRTKVEQSGEDIYMNATFPPAKSYEKFYELIDHDFDILYYPDNENTKMIMGRVRDLMKKASASFKIRINGSSSAEEMESWFASKYKNSSSIGFTNLGFGIIFQELSQDKLVYSMRSTKMSIWNTKSLFPQNMPPGRLESGSFYLDYGFVPIQSAINMGFMDYLGYNFDKDWSIQDFPYPGYKREKPDAFKLVYMVGLPIVFVFGLTPILISLLGYIVTEKNSGSREILKMNGVGSLGIYGYWFAYVLWQLIIIITVTVILLKTDFKNGAVLEYSNPVLLWIFFMLYAIHAVFMVFFVASLFSNPTYASVFYLFIVLAISALITNFEKPTASAIGLLLILTPLGSINHGIRVIISLESSKQG…
mRNA7852	MTISQENQPLLISDSNGHVKYKSFRETQKYDDGPDPPPKIEYAAVHIDDPIGYTWKDLKVVSDISTFQKIKQSITKKPALKKTLIANAYGEAKPGELLAIMGSSGAGKTTLLNCLTFRTDRNLEVTGSRLVNGRQVTSTSLAAISGYVQQQDLFIGTLTVKESLIFHAMLRMHRSIPFNKRLNRVEEVMAELNLKKCENTIVGIPGKIKGISGGEMKRLSFAAEVLTDPMLLFCDEPTSGLDSFMAQNVVTVMRDMARKGKTVISTIHQPSSEVYAMFDKILFMAEGKLAFLGTPDDATQFFKSLGSVCPSNHNPADFYIHLLAVAPGKEEECRRTITMICDSYDQSKLGKEIISNATEIQDLTSLRTKQINHKSKYKANWCEQFRAVFWRSWMSVVKD…
mRNA7855	MTESDPGSLKTDPSIKSLEENKEVPNKRSIEGTSPEPLKIESAVNIDEKVSYTWKDIKVVAVSSNFQKFKQAITKKPDPKKTLVVKAYGEAKPGELLAIMGSSGAGKTTLLNSLTFRTDRNLEVSGSRLINGRQITSTSLAAISGYVHQQDLFTGTLTVKETLIFHAMLRMHKRISFHKRVIRVEEVMTDFNLKKCEDNLVGIPGKIKGISGGETKRLAFASEVLTDPMLLFCDEPTSGLDSYMAQHVVTAMRDMARKGKTVISTIHQPSSDVYAMFDKVLFMAEGKLAFLGTPADALRFFESLGSPCPTNHNPADFYVHLLAVTPGKEEECRDRIAKICESYDQSNLGKAIISNATEIQEGENLMKQKHKSMYKANWCEQFKAVFWRSWMGITKDPTA…
mRNA8023	MADISDIYLNFTFAWSWKDFCGRDNFQVWDREHKDFDICFQSVSFYLPITSLIAILSSYYLGALHSRVLRLKREKWILRIRSTVSLLLSALPIVRVYMEETFFPGQILPVHYLLAVFECVAWFMHFCYLVSLISKAGPTVRGPVVLGVVWTSNFIITWLNVHSNYLIYLKPDSELYRSGIPFYFSVVMVVLQCLYLMTLIPPGRESRRERFEPLSRGEHSPLVGNYSRFRELVEADYLGRAMENRGLFSRLFFHWVNPLIEKGVAGNVANVDDLFELPFNLKSSDLWKKLSFALNPINRDVRTPQITLLKALHVCFWKQFYGVGILRIVADVSGFCGPLLLNLLIRFIENKDEPIKYGYVYALGLSVSALIGAFCNCHYNFMISKIGLKIKGSLVSVIY…
mRNA8061	MVGTEAILELRNIFHSGQVEPSSLMQRIFGNIETGLILKDVSLEVKAGEVFAVLGSKGSGKRALLDVISRRSRGATRGQILFERHPLTLSVFQKSCGYVTHRTDLIPSLNTEQTLYYAANLTSEKPSNFTCSTRVRQMLGDLALNQVAHYSVPSLNTSQLRRLVIGIQLIKDPVLLLLDEPTADLDPLSTYLVVSILSSYARRRGRAVVLTMEKPRSDVFPFLDRAAFLCLGDILYAGPTRLMLEYFNSIGFPCPATENPLMYYLCLSTVDRRSRERFMESHSQIVELVEKFKAVGGNYMSGQSNHQSSIKSEYKPSKPNCFQVSTTLYQRLLASTFNITPFGLAHMMLRLAFFPIFSLAVFLLYLNTQSYENPPVNKLGVLFFSLFGAYVCSSITTSY…
mRNA8307	MGFFHQLKLVVWKNTISRSRHKLRLVIEIVWPLFLFLILMWVRTRGLQTKVGECHLTEKPLPSAGFFPFVQSFICTLNNTCHADEETAKTFLPILNEKTIGDLIEKIRKITNETSDPGMRRLLNQTSRDSSSLLNVTQMIQNDRGNTNNRKFTLKRVLRDVNSLYNLSEEIGLSKEELSTIVNTEINSDTNLFSLIFDDEPQHCFFVNNEVSNVIDESLCSLNKKQFGILRKSIDENWNKEYSKSMVKLYIKQNVDLTASYDNWISSTKAWSSLGKSINEVENYSERITEMADQQPRSSTTDILNSPAIQIYNALFEFMCGKQPNTREGFISGKTRQMEDIQKKFLKSTKFKYDYDNYTTPECNMLFESFETNPISMVIWKLYKPLVCGRILYTPDTPA…
mRNA8308	MKPGVQIMNLTKIFPNKKKAVDNISVNFYEGQITSFLGHNGAGKTTTISILTGLYPPTSGTAIINGHDIRTNMTAARKNLGVCPQFNVLFPRLTVEEHLKFYGKLRGGKDMNALENEISQMLVDLNILEKREAFSTDLSGGMQRKLSIAVAFIGGSKTVILDEPTSGVDPYSRRSIWELLIKYKTGRTLILTTHYMDEADLLGDRIAIIAQGKIICVGSSVFLKSTFGKGYQLTVEVAPDSSTRPSKASFNQDGEISVSNLSNIDNLTNFIQEIIPGCEIADRIGKEVIYNLPNQYSSRFAELCSRLDKEGSKLNIVSYGISDSSLEEIFLTVAIDDSKEDEIKSSGCNCFKKLFTAPRSSGHSSSNVPSTADSSIPMPRSEEEQKSRARLWKQFYALH…
mRNA8515	MVSDDHEENELALLPSGSQLFHISTEGGGPSPAGSLRHKSGSLSKKQANKPPPDSLVINLKRPFSFNHLPQRPPVNIQFNKLSYCISQECNGGQKSLLKSISGKFQSGELTAIMGPSGAGKSTLMNVLAGYRTSGVSGSVMINGKDRNSRRFRKMSCYIMQDDRLLPHLTVYEAMTVSANLKLGRNMNKKEKRIVVEEILETLGLLDCSNTRTCNLSGGQRKRLSIALELVNNPPVMFFDEPTSGLDSSSCFQCLSLLKCLARGGRTIICTIHQPSARLFEMFDHLYTLADGQCIYQGDVSGLIPFLSSLYLECPSYHNPADYVMEVACGEHGDVHDKLVLAVMNGKCNAFNSHEKNNKELLANGDATHNNQNKVSCTSALLHSDESLNTGPNPGYPTS…
mRNA8523	MLFGKPYHVVNFSATYALLVFLLSQVLIVIIIFIETFKTTSFLGILTVLTPAGSLAHGIGMIAFYEQSGIAFKSEDLTSNKGPRFHPYLLIILAPLITMVFLMLLSVYMELVKPGEYGRAKPWYFILPKSMKERLRAKNEFNPNPRRSSVALVEEKLNNKGEIRVRNLRKVFKKFVALNNFSVDFYKGQITALLGHNGAGKTTFLYTITGITSPTSGEIFYKENDVLLNFNEFRESFGFCPQQNILMNDMSVKQQIVFFGMVKKMKKAEAVEFVNDFLEKVNMSDKKNKLPKKLSGGMKRKLCLANAIVNDPPVLFMDEPSSGLDPESRRSLWDIILELRKDRTIIITTHFMEEADILSDRIAIMANGELRCIGSPIFLKKHYGFGHSISINYKNNPEE…
mRNA8588	MKVTEGSDVPLVGRRGSVKVTITPCQPKVLTHLPKRPPVDIAFSDLTYTVKEGSKSTPKTILKSVSGRLKSGELTAIMGPSGAGKSTLLNILTGYKVSGMEGSITINGNERDLSQFAKLSAYIMQDNQLHGNLSVEEAMNVATALKLGKEITKQEKAKVIQEILETLGLQEHIKTMTSNLSGGQKKRLSIALELVNNPPIMFFDEPTSGLDSSSCFQCISLLKCLARGGRTIICTIHQPSARLFEMFDHLYTLAEGQCVYQGSTQQLVPFMATLGLVCPSYHNPASFIIEVSCGEYGDYVRKLVTAIQNGKADIQTGKPFPVGQLNNADAEKKLNNAENAEMQGSNGTNNMLLALAQNDIAKDVPHQTGDGVVIPIELTDSEKTGGVTSTLLADALPKS…
mRNA9105	MVDRNDHARIFEYWRKMEEGKMPKVGKYLPKRAPVDVEFNELTYTVPLAKNCSKIILRSVNGYFKSGELTAILGPSGAGKSTLLNVLAGYRNGDGGGQILVNGLPRDLKLFRKISRYIMQEDCHQKGLTVFECVMIAADLKLGTKVSQEHKQLMALEIMELLRLTKCKDTLTDKLSGGEKKRLSIAVELVDNPPVLFLDEPTTGLDDLSSSQCISLLKSLARGGRTVICSIHTPSARLFALFDNVYIVAEGQCVYQGLGEDVVPFLSTFGLDCPKHYNPADFMMEVSSGEYGYYVDKMSTAIENGRCKRYNKKASAIRQLDRQLSEAEFEQLSKTAEYGCSTWGQFLILISRMFLQFWRSMPYQILVISLHVFVSLIIGGIFYNFGNDASKTLFNFGFC…
mRNA9438	MDDCGQYLKSEFPLINDDLYEYVESVLKSGVDDFEDSEEVYEAVGGVLHEVADEKSEDEIREVCDRLLGLLRGTKNGDVDLKRSGNKMLNAPVHLGSMAANAVENVEEVRSIWMMHRDETLKVDAKKLEKAEQKLQQKQEKRAEISVSNKSVPPVKLQSATASQVTSKKESKMEAKGTNRTQDIRIENFDVSFGDKVLLQAADLVMAFGRRYGLVGRNGLGKTTLLRMISSGNLRIPSHISVLHVEQEVIGDDKSAIESVLECDLARQTLLDREKEINQLLNAGSSDMQLTNELSEIYAALGAMEADKAPAKASVILAGLGFTYEMQGRATKTFSGGWRMRLALARALFSRPDLLLLDEPTNMLDMKAIIWLENYLQTWPTTLLVVSHDRHFLDTVPTD…
mRNA9445	MNGMAQTSKEADDKCGDCGGCCNLTTRGKTKALLQKNFLRMWRNVGVMLFIFALPVMQVILFCLAIGRDPTGLHLAIVNQEMDWATKRCPVYHNCTFQSLSCRYINALRNDTIVKDLYPDVESAISSVRDGYAWGVLFFNKNYSKELTARVILGTDADDYTLEHSEIKAWLDMSSEFFFHLRCTKHDYYETPDSAIEAVKVGDAWGAIYFTDNFTDALVARMALGRDSDEETLDQSELRVWLDMSNQQIGLMLNRDLQVAYRDFAQNLLTACGNNPKLADIPIQFREPIYGSNNPSFTDFVAPGVILTIVFFLAVALTSSALIIERMEGLLDRSWVAGVLPHEILFSHVITQFVVMCGQTALVLIFMILVFKVECKGDIFLVIILTILQGLCGMCFGFV…
mRNA9894	MTGENAVVVRGAYKRYGPNGVVLRGLDMTVPQGSVYGFLGPSGCGKTTLLSCIVGRSKLDAGSIEINVKSRSNIGYMPQELALHKELSIAETIAYYASLHGISWSDLKKRKQELYTFLHLPDEDSIIGECSGGQQRRVSLCVALLHNPQMLILDEPTCGVDPLLSQNIWEHLLHMSSVFKKTIIITTHYIEEAKQAHRIGMMRGGILLDENEPNQLMLRHNCDTLEQTFLLLSTKQSNVEIKNQSIDYPKPDKKPPSPIKDRNTISINHVSSYIIKSIYWLKRNTAILTFLLLLPIVQCTLFNYTVGRDPIGLRIGVVNEEFSGLSTDCFSFTNNSCSPGFPLSCAFIKVLKHKNLEIVDYSNGMRAREGVEKNDVWGYIHFSKNYSNALFERLSLNLQ…

## Sheet: 2. GSTs
mRNA13082	MGLAEPIRFMLSYLGEEFEDERILPADWHFFKTKMPFGKVPVVEINGKETTQSMAIVRYLAKQADLNGKNDWESLQIDMVMDCFFDFRMAFVSAFFETNEVEKAKKVDILKNELIPLYLNKFDLAVKSGGYLANKSLSWADIFFVATSYSLNYRMGTLLNMDMFESYPNLKVLKNKIEMIPNIKAWIEKRPKTDF
mRNA13086	MPKYKLTYFDGKALAEPIRLMLSYLEEDFEDSRFGIEEWPSIKSSMPFGKVPVLAIDGKQLHQSTAITRFLGKQANLNGKNDWEALQIDMAVETIHDLRTAIADFHYEKNETMKAKKKEVSLRDTVPFYLSRIEEMVKSNGGFLANGALSWGDIYLFGVSDYLNRMMGMDMFEKHPNLKALRDKVAAIPQIKAWVAKRPVTEF
mRNA13087	MAKYKLTFFPIKALGEPIRLMLSYLEEDFEDFRCEIDEWTSIKSSMPFGKAPVLEIDGKKLHQSIAITRYLGKMANLNGKNDWEALQIDMAVDTIHDLLAEITDFYYDENEKSKANVLDTVHFYLSRIEEMVKNNGGYLANGALSWGDIYFFGVSDYLDRMMEMDMFEERPNLRVLRDRVAGIPQILSWVAKRPVTQA
mRNA13088	MFFCLETPFGKVPVLEAEGKVFNQSIAISRWLGKKANLAGKNDLESLEIDNVAETFNDIRMATSLMFHEQNPEEKAQKIDFLTKEMYPLYMSRFEKMAQENGGYLANGSLSWADIYFVSVIDTLNFMMKFNILEKHPNLKALKEKIEKIPRIDAWIKKRPVTDL
mRNA13089	MPQYKLTYFDLKGLGEPIRYLLSYLGENFEDNRFPREQWPAMKPKTPFGKVPILEVDGKPLTQSTAIARWLGKKANLAGKNDWEALQIDIVVDTFTDMRMAIAQTWMEQNPEEKTKKMDVLMKETIPGYLSKFDKTVKESGYLANGSLSWADLYLCAVMETMSFMINGNILEKYPNLTALKQKVEELPKIKAWIAKRPKTDL
mRNA13090	MPQYKLTYFDIRGLAEPIRYLLSYLGEDFEDNRISKEEWPSIKPKTPFGKVPVLEVDGKQLTQSFAIARWLGKKANLAGKDEWEALQIDIVLDTFGDMKNPISQAMSEQNPEEKAKKMDVIKNETLPSYMSKFDKIVQDNGGYLANGSLSWADLYIAAVMDSFSAALGENVLEKYPNLKAHKEKVENLPKIKAWIAKRPKTDM
mRNA13091	MPQYKLTYFDIRGLAEPLRFLLSYMGEDFEDNRISKEQWPSIKPKTPFGKVPILEVDGKAICQSIAIARWLGKKANLAGKDEWESLQIDIVIDTFGDMKNSISQAMSEQNPEEKAKKMDVVENETLPSYMSKFDKMVQDNGGYLANGSLSWADLYFAAVMDSFSARLSENVWEKYPNLKALKEKVENLPKIKAWIAKRPKTYK
mRNA13092	MPHYKLTYFNFRGLGEPIRFLLAYLGEDFEDNRIPMEEWTSMKSKTPFGKVPVLEVDGKPVTQSIAIARWLGKKANLAGKDDWESLQIDIIIDTVNDMRMGIAQYWFEKNPEEKAKKLELVKKDTIPEYMSKFDQIVKDNGGYLANGALSWADLYFASIMDSFSFMVEESVLDKYPNLTALKEKVEELPKIKAWIAKRPVTGL
mRNA13093	MPAYKLIYFPSKALGEPIRLMLSYLKQDFEDFRFRREDWPSIKPSMPFGKTPVLEIDGKQLHQSTAITRYLGKQANLNGKNDWEALQIDIAVDTIHDLRAALAEFWYEDNEAVKAKKREATLRDTVPLYLSKIEEMVKNNGGYLANGSLSWGDIYFFGMSDYLNMMMGMDMFEKHPNLRALRDKVAAIPQIKAWVAKRPVTEA
mRNA13212	MSIIGKPILYSYWRSSCSWRVRIALNLKEIPYDIKPVSLIKAGGEQHSNEFREINPMEHVPALQIDGHTLIESLTIMNYLDETRPQRPLLPQDFYKRAKVREVCDVIATGIQPLQNLIVLIYVGEEKKKEWAQHWITRGLRAVEKLLSSCAGKYCVGDEITMSDCCLIPQVFNARRFQVDLRPFPIILRIDRELENHPAFRAAHPSNQPDCPPEATK
mRNA14868	MSVKHLGAGSKDVPLEAGKLRLYSMRFCPYAQRAHLVLNAKNIPHDVVNINLKQKPEWYLERYPLGKVPALVDGEESLYESLIICDYLDEKYPEVPLYPKDPAKKAKDRILVESFSKVISLLYQCYLSPSMDVALLDPVFDGLDSFEKELGSRSTIFFGGEKPAMVDYMIWPWCERLEMLKVIGGDNFKVPKDRFPKLLEWSKAMVEDEAIKKHLLTPEQHAKFLQSHRAGVPDYDNIV
mRNA2095	MSKRHLSSGSNDVPMASGKVRLYSMRFCPYSHRVHLVLFAKNIPHDVVYINLKQKPGWYFERFPLGKVPGLVDGENIYESVIICDFLDEKYEENPLYPSDPGKKAKDRILIDMFNQVITFLYRCYTSPIMDVAHLVPVFDSLGPFERELGKRGSAFFAGEKPGMVDYMIWPWFERLEMIRIIGGEEFKFPNERFPKLLNWSNTMTDDEAVKKHFLTPEQHAKFYRTFRDDAPDYDIIF
mRNA4185	MTIDFYYTIGSPPCRNVLLTAKAVGVELNLKPLNLLAGEHLKPEFLKINPQHTVPTLDDNGFIVTESRAAMTYLFNAYGKDDSLYPKDPKKRAMVDQRLYFDMGTLYGRFADLYYPMFFGGAPYDNEKGKKLEEAYDVLEGFLSQTPWAAGDSMTLADLALVASVSTHEVAGVEISKYPHVAKWLEKCKASVPGYKECNEAGVEVFKNAFCKNLKK
mRNA438	MPKTDDIELGQYFSFENAAFKVYLITGCLLILKMFLLSILTSVQRKKNKVLASPEDANLFKNYKFESNPDVERVKRAHRNDLENILIYFTAAFGYLMTGPSTFVAILLMIIFTVGRFIHTYVYAINVKPQPARVLAWAAGYIVTIYMALSTAIHFY
mRNA439	MENVISQMMSFENPVFKSYLFYCTVLVVKMMIMGPLTARWRFARKIFANPEDAKMQGRKAVVKYDDPDVERVRRAHLNDLENIPAFFVAAWLYLLTNPNPWLAVTLMRSFVLARIAHTLVYAVVVVPQPARALAFAVGYGITAYMAGVALISFL
mRNA5385	MSQYKLTYFDVRAIAEPIRMLLHYMGKSFEDVRISFEDWQKVKSASPFGKLPTLEIDGKMTHQSVAICRYLGKLASLNGADDWEDLQIDIFVDTFQDFRKEISAFHHEKDPTEKENKKKIILDEKIPFYFEKFDSIVKENGGYVANGKLSWGDFYIAAFSESLHTILAVNVIDNYPNLKEWRNKFFEIPQVKDWVAKRPNSIL
mRNA6239	MELFTGENPVFAGYAFYSGILALKCILMSFLTGYTRFRKQAFVNPEDAAMAGVDIKLVPDDDVERIRRAHLNDIENILIFMITALIFVASDPNAIFALMLFRIYTIARILHTVFYAVYIVHTMARTISFQIGAWTNIIIIFYIFYAFPQF
mRNA6511	MTEYKLTYFTGKGLGEPIRMMLSYMKKNFEDNRIKPEEWAAIKPTMPFGKVPVLEIDGKRIHQSVAITRYLGKQAKLAGKDDWEALEIDIIVDTLHDLRSAIQSFFYEENESSKTKKKETVMKDVVPLVLKRLDDVAKANNGYLANKTLSWGDIYFVGVADYLNYMLQMNMFEKYPNLKKVSDQVMAIPEIKAWVEKRPKSDF
mRNA6524	MPTYKLTYFPIQALAEPIRMMLSYLKEEFEDVRFKREDWPSIKPSMPFGKVPVLEMDGKQLHQSTAICRYLGKQAKLAGKDEWEALQIDIAVDTVHDFRSAVGGFFYDNNEETKAQKKAVVLNETAPFYLAKFDEMAKANNGYLANGTLSWGDIYFIGISDYLNFMLEFNIFDKYPNLKTLRDNVVAIPEIKAWIEKRPKTDW
mRNA6586	MVKYKLTYFPIQGIGEPIRMLLSYLQQDFEDVRMDVKDWSSVKSSFPFGKIPLLEIDGEKLHQSTAICRYLGKQANLAGDDDWEALQIDMVVDTLHDFRSAIRRPYFDKSEEMEVQKKALSDSAPLYLGKFDEMAKNNGYLANGKLSWGDIYFISLSDYLCYMLEYNLFDKYPNLKKLKENVVSVPEIKAWMERRPKTDV
mRNA6587	MVKYKLTYFPIQGLGEPIRMLLSYLHQDFEDVRLDIKDWSSIKSSFPFGKVPLLEIDGVKLHQSNAICRYLAKQAKLAGDNDWEALQIDMVVDTLHDFRSAIRGYYYDKSEERKAQKKVLSESAPLYLGKFDEMAKNNGYLANGKLSWGDIFFVAVSDYLCYMLEYNLFDKYPNLKKVKENVVSVPEIKAWMERRPQTDV
mRNA7493	MRPLLFYFDDLSQPCRALEIFMKINKIPHTKKEIRLSEGAHLTEDFARINPLKKVPVIEDNGFILTESIAIFRYLCRNYKVDDHWYPKDTKLRARVDEYLEWQHIGARAPCALYVWDKVFTPLMTGTPVSERRLKNSMKRMEDACDNINNIWLKNKKFLTGDSITIADLFGVAELEELCLTGYDPKENRVDLASWMERVRNRTNPHYDEVHSTLRRISKNFAESKL
mRNA7607	MAVKLYYFEMTGLGEPVRLMLSYGNVKFEDIRLSKEKWTEMKKGLRWNQLPKLEIDGLQLSQSKTICRYLAKKFDLCGSNDVEATFCDMMVDMLDDLRGKITKVYYTPDSAERDAQMDELRRNVVPTDLSKFESHVGENGGFMVAGKLTWADVIFLSFADYFIQLLGDDLVLQYPKLKVLREKVIANQGIKNYLKNRPSNTSDMRKIFF
mRNA7762	MSVVLYCAPLGFPSRSVMLLARALNISLDIKTIDLFAGEHRSEEFIQMNPQHSVPFMVDGDLKIAESSAIMMYLSDEYGKDDSLYSKDTKQRAVINSRLSFCSTLATRFITTYIAPVLFKGLGINEESMESLDDAFNILNTYLDGNDWVSGDQMTIADYSFVAAVSTAEALGYEVSKHENVFAWLSRCKETIEDYEDLNQNMCDMIATYFAEKLSQIES
mRNA8736	MSNYKLTYFNIMGLGEAVRFMLSYLGKDFEDKRIEDFSLWLSEYKPKMPYGKLPLLEIDEKKTHQTLAICRYLGQEGKIAGDTPWESLEIDMIMDTFSDFRVAIWAYFYCRDEEYRGKIKTQLFSVTIPFYLGKFDNIIKENGYLANSKLSWGDIYFVAILGYLSFMIEEDICEKYENIRHLRDRIHEIPNIKNWLKKRPETTW

## Sheet: 3. CCEs
mRNA11396	MSSEVVFALALIFNFANGELLELPQGKIRGATLSARNSRDYLAFLGIPYAKPPVGELRLKNPEPLEKWDGEIDGTQMPAPCFQISMHNRSLKIGQEDCLKLNVFTPNSKPEKPYPVLLFIHGGAFRVGAPPGIHGSGYFLEKDIVIVTIQYRLGILGFLSTEDEKIPGNFGLKDQSMAINWVKENIKNFGGDPEKISIYGESAGGVSVHYQALSKLNKDIIKMAISGSGVINKFWALEDKGEASKKAQEVFKITGCSDLKCLQTKPADELQSVEFQFTYWDVEPLTVFKPVVEAESDGAFLTVNPLKEKVKVPWVTGFSSDEGLLKIAFLEMNETAKNEFYTNTELWIKKMLVSEDSKDLDETVKTIMDKYFKGSNEEKLNGLEKFYGYLYFVAPIFEI…
mRNA11452	MAGLVFLGLLVVNFVYGDVVELPQGKVRGTTLKARNGRDYLAFFGIPYAKPPVGNLRLKNPEPLSKWEGELDGTQPARACLQMIVRNFNSTYGDEDCLKLNVFTPTTKPKVLYPVLLFIHEGGFRAGQAPGKYGAGFLLEKDVVVITIQYRLGLLGFLSTEDEKIPGNFGLKDQSMAINWAKENVRNFGGNPDKIAIYGESAGGVSVHYQALTKLNKDIVKLGISGSGVINGLWAKKGDALKKAKRVFALTGCNDLECLQTKSGQELQILEQYFMYWDIEPTPVFKPVIEPEGKGAFLTVDPLTKKVKIPWLTGFSNDEGLIKTGFLELNETAKEEFLNNTKLFVKKMFDTDESKELDETVEIIMNKYFKHSDEEKFNDLKEYYTYVVFLVPIFKALKN…
mRNA11453	MARFVLLGLLVVNFVYGDVVELPQGKVRGTTLTARNGRDYLAFFGIPYAKPPVGNLRLKNPEPLSKWEGELDGTQPARACLQMIIQKYNSTLGEEDCLKLNVFTPKTTPEVLYPVLLFIHGGGFRAGQPPGKYGAGFLLEKDVVVITIQYRLGLLGFLSTEDEKIPGNFGLKDQSMAINWAKENVRNFGGDPDKIAIYGESAGAASVHYQALTKLNKDIVKLGISGSGVINGFWAAEKKKGDALKKSKRVFALTGCNDLECLQTKSGQELQNLERDFMYWDMEPIPVFKPVIEPEGKGAFLTVDPFKEKVKIPWLTGFSTDEGLLKIGLLERNETAKEEFLNNTQLFVKKMFDSDESKELDETVEILMDKYFKHSNEEKFNGLKEYYTYVMFLVPIFKA…
mRNA11939	MSENEVQEKGEEIISEDKKQIAEEEKEKMIDSNEENEKDKEVKVSEVEKKKKALEEAALGDVEKRRIPIGGIKIPGFLKSAKSREKAKEGEENEEGTDLLEQPCTETKVNEKEKEAKSGSKLPLFDRFANLKVPTNLKVPGNLKVPFLKRKSAQDSTDDATKETEESNGPRRPNLINAIRLPLANLVPKKKHKDGDDVGQAGLASMETLDDESKHDDGMENVNLESNDIDPEKAQLEQQEREWSNWRKHWTMIKDHKMASAGIFIFVILFLVLIITVLAGPKVPTHAPIIDGKYINAVTTCGLVEGLMENNAFVFRGIPYAKPPLGEGRFRKPTSLKLEDCWDGIFKAHNATNPCWQVYSNGSLNGDENCLTLEIYTPQIKYENPLPVIVLIGSESLLG…
mRNA1225	MSRWIGCVLAVVIGLANGRPYSGPTERNHTSPKVEELDPLIVQTRSGLIRGTTRSVLDREVHVFTGIPFAKPPVGPLRFRKPVPVENWHGILDATTLPNSCHQERYEYFPGFEGEEMWNPNTNMSEDCLYLNIWVPQKLRLRHHTQDKYNKPKVPVLIWIYGGGYMSGTATLDVYDGVMMAATSDVIVASMQYRIGAFGFLYLEPLLKTGSEDAPGNMGLWDQAMAIRWIKDNIEAFGGDPDLITLFGESAGGGSVSIHLISPVTRGLVRRGIMQSGTVNAPWSYMTGERALDIGKTLVEDCGCNVTQLAESPSRVMACLRAVDAKTISVQQWNSYFGILNFPSAPTIDGYFLPKDPIELLEEGDFPETEIIIGSNLDEGTYFILYDFIDYFEKDGPIF…
mRNA12797	MTSMVWGVVWCLVGYLFAATATRTIRTKYGDVSGVMVTPDSRHLGAVEVFKGVPYASPPTGSLRFMPPVTGAIWSGVKVADKFGPVCPQMLPDIGNETAALKRMPRGRLEYLKRLLPYLKNQSEDCLYLNIYAPAGISSFTTHCYDLSLAFCGHKGIPRWWKMWSKHLCTTFCL
mRNA12799	MNGCLLCFQRMGTVHGEELPYMLGAPLVDGFSHFPKNYTKSEVALSEAVIMYISNFAKTGNPNDFQTKDTILAGSKERNRFRSINWEEYDPVHQKYLEIGMKPKMKNHFRAHQLSVWLRLIPELHRAGMEDVVARHNLFRNHNDDDLYDGVVRADPLSRNGLKIQEMQRRSGMNGTVAEVLLPVTTMETMVTTCVSVQINQGYVNQHVANSTDTFASLEAAGYAAYSTALKVTIGIGCSLLFLNILIFAGVYYQRDKTRMDVKNMQQRVSSFESGKSFPPSASVIVDVDDSVILTGGTLPRSHATVAQHHSLATLPRQMKGELPPNGSAGLHLPRPPPPPRNKSPPESQPLLNQDPGKQGKPPLRVPQAAISEMRV
mRNA12800	MPVWLFLLLLGLVRGWRETPQNYAEQTKKIKIRQGEIVGIVTHPRDSALKPVQTFLGVPYAAAPVGNLRFMPPGSPLPWSGVRVADTFGPVCSQIVPDYSKMNVSAGRREYLKKITAFLQQQSEDCLNLNIYAPKNDYAWGAEKLPVIMFIHGESFSWNSGNPYDGSILASYGDVIVVTINFRLGIFGFLKQTFKIGEIGNLGLLDQIAALKWIQDNIEAFGGDPNSVTLMGHHTGAIAANYLMLSPMVQGEQSLFQKVIMMSGSALSKGAKVKHPQQVLISVAEHLNCPYERLQLCLRTKRVDELLEVSKLFEFAPIVDSLLVVNEAKDSMTKYTNLFTRYDLLCGVVELESYHQLSAVALAHGMLDEERDEILEKFFRENFETHPELARAMATSVYE…
mRNA13629	MIWFLFFVTFASAQVLKTKLGPIRGFQSISRDGRSYMSYTGVPYAKPPIGELRFKNPEPFGSWDGELDATNPIPMCAQTNLFFRLPGQSEEVLGQEDCLYLNIYVPKDAKGFPVLLHIHGGGFKMGYPGPKEMANYFMDEDAILVTITYRLSSFGFLSFEDDVITGNFGLKDQSMAIKWVYENIANFGGDPDKITVFGESAGAGSTHFHLHSPLSRDMIKGAISESGGVNRVWTLAPKGFMRSRTLELARNLSCTGESQEIVECLRKVDFKTLSFLSDNLFHYWDMDDVIPWRPVIEKSLPGSFISEDPFSMTITKPWLAGSTIGEGLFRTSTLRIKPKEIVDEIARKTDEIISYPLNMDKDDPKNRNKLDLIRKRFFKSNESEDLITGYEKLFSEAFF…
mRNA13630	MRFAGLVLLFCIGAHARLLKTKLGPIKGTSGISRDGLEYQKFFGIPYAKPPLGQLRFKNPVAVEGWKEEKDCTKAPPLCTQLPIFFTRDWSKTWGQEDCLYLNVFTPELKPKELMPVLVYIHGGGFRCGGPGGENSADYLVDEKVVFVNLQYRLSALGFLSTEDDVITGNFGLKDQSLALKWIHENIEDFGGDPDRITIFGESAGGASTNYQMIAPSNKGILKSVISESGTVNEFWAFDKPGDARQKAFKLAELFDCHARDSNDVIACLQTKDASDIVMKEHDFMFWMFNQACIFKPVMETKLPGAFITEDPHYIETETPWMTGVTSDEGIIKKAFLENDDANVKEFVRNIDSYLPRILYMDDANSKVKESMKMVKEKYFPNLDDLEGVKNGLGDVVSD…
mRNA13634	MKVLLVLLLAHLALGRIVKTNSGELEGWETKSRDGRLYEAFTGIPYAKPPIGPLRLQNPEPVEPWDGVLDATKDGPRCLQGSLFQLTLSAPAFEGQEDCLYLNVYVPKGGKNLPVLLYTHGGAFKMGYPGPRDMADYMMDEDVVLVTLTYRLGALGFLSFEDKIIPGNFGLKDQAMAIKWTSENVGSFGGDPSRITVFGESAGGASSHFHLFSPLSRDLIKGVISQSGVVNKNWGLSPRAGLMAERALKVAEKVGCANECPKMSLNCLQEVDPTKLIDAEKMFTYWDIDDVIPLRPVVEVNIAGAFLTSDPYTMKSTKPWITGFVTGEGLLKSIPLHVQPKHLMEEFRTRFEEIKAKQLSLEMGDPQTKVVIDKIKQKYFTNDEISSLIESEGNFFADA…
mRNA13726	MWVCVLLCLIATQGSDGGGTLTRVISTRFGKVQGFLRPMGAGRHLKPIEVYLGVPYATPPTGSNRFSPTRTAAPWEGVKMTDKFGPVCPQRLPDIRNESAALERMPRGRLEYLKRLLPYLQNQSEDCLYLNIYAPSQGHPG
mRNA14705	MFVYIFLLTLFAAQTAYGQVGRRYYDKDGNYIPPSEADVDFKTFVYGQRRYGQNPSNYPQSPTSGGRPYNPYGPPSPPEFGPDGRYNPPNIYSPNYNPLEFQPGIPRQNDPRFDQAGIELPGILGGWRADLQGKQRPDSPKQETDRDVVVTTSYGQVQGFRVYLYDRPDPGFRPWYLDGKVERAETKVVTFLGIPYAVPPVNEGRFKPPRPHPGWQQVLHAVDFGPGLPSTQ
mRNA14891	MNHILLFLTLLLSKNAFAQQPEVNIEQGPIKGIFMETVSHRKISAFLGLPYAKPPIGNLRFKEPQNPLNWNGVWNATSLPPDCLQYRPIYEPIHGSEDCLYLSIFVPEEPKVHKKLLDVLVNIHGGGFMYYSSSNYGPEYLLDKDVILVNVNYRLGVLGFMSTGDLVVPGNNGLKDQNMALKWVQKNIRRFGGDPKKVTLTGLSAGGASTQFHMISPKSKGLMQKAIVASGSVLCNWVQTENAREKAFTLARHFGCRTSDTKKMIECLRQRPGEHLVASTKLFMDQRFLSYEPTKKRDFRVFAMKKVWLYYPFSPFGTVVEPSHPGAFIDRPPSSYLKKGLTNDIPVLFSLTADEGLFPGLELMGDDAKLKYLDKNWKTLFPHVLDFNFTSNN
mRNA14895	MFNLVLVLFLIQNAIGGQPEVQVEQGTLKGVFTESISHRKISSFLGIPYAQPPVGSLRFREPQNPSPWLGEWNATQLPPDCLQYNQLGGVIQGSEDCLYLSVFVPEEVKDHKQLLDVVVNIHGGAFMFFSSSFYGPEYLLDKDVILVNVNYRLGILGFLSTGDEVVPGNNGLKDQLAALKWVQRNIKSFGGDPNKVTLVGLSAGGVSTHYHVISPKSKGLFQKAISMSGSVLCGWGQAENVKEKAALIAHRLGCPTDTSSEMVECLKERPGHHVVDPKILTAWLNYPFTPFGPVVEPSHPDAFIDQPPSSYIKNDLFNDVPIIFSLAADEGLWPGAEFLADSSKMQYLDDNWNAVAPHILDFNFTAPRDEHPQISDKINLEYFGNDDIKNSNKALIELI…
mRNA1497	MVRSKVEEMVFRYNYTINREGIFRAIKYRYTYWPDPKNHTHIREQYIDLMSDFLYRAPVDQMVKLLVEKQVPVYWYVTNTTIESLKLPLWRKAPHNIEHLLLTGAPFMDTEFFPEKMRLTRTQWTDNDRNISYFFIKAYTDFARYGDPSPQQILGIRFQMARHGRLFYLNFNTTFNSTVEINYRQTESAFWTWYLPTVIGIVIPTYPPFTEYWWEPKQPLQIAFWSMSGTCLLLIVVVVIFCLLWRNAKRQSDRYYGTDLLMIGMQDGESQGIENPRTQSAGNIYEYRDLPVKTKPIERKGASTPASLRSSDGSLSARDGVLTSPNGRPKTPPGKRTLSKKSVSGSTSSVPMTQV
mRNA1509	MVRSKVEEMVFRYNYTINREGIFRAIKYRYTYWPDPKNHTHIREQYIDLMSDFLYRAPVDQMVKLLVEKQVPVYWYVTNTTIESLKLPLWRKAPHNIEHLLLTGAPFMDTEFFPEKMRLTRTQWTDNDRNISYFFIKAYTDFARYGDPSPQQILGIRFQMARHGRLFYLNFNTTFNSTVEINYRQTESAFWTWYLPTVIGIVIPTYPPFTEYWWEPKQPLQIAFWSMSGTCLLLIVVVVIFCLLWRNAKRQSDRYYGTDLLMIGMQDGESQGIENPRTQSAGNIYEYRDLPVKTKPIERKGASTPASLRSSDGSLSARDGVLTSPNGRPKTPPGKRTLSKKSVSGSTSSVPMTQV
mRNA174	MKPGVFVLFFAIGAFARPELTLKQGKIVGKYEETISGRKISSFLGIPYAKKPIGKLRFHEPVRAGNWMGVLNATRFSADCLQYSPSGLRGDEDCLYLNVFVPEEVDRKKRLDVLVYIHGGAFMYLSGSQNGPKYLLDNDVILVTLNYRLGILGFLSTEDLTLPGNNGLKDQQLALRWVKENIEAFGGDTEKITIAGMSAGGSSVHYQILNSANKGLFKRAIMLSGSAFCHWSQIENSRRKAEKIADEMGCLDSSSEKMVECLRQRPGHHIVELSKLFMGWRYNPFTPFGPVIEPTHSKAFIDKSPSYLIKNKMIMDIPLMVSLTADEGLYPGAEILADPDLMDHLDENWDEVIPHLLDFNYTVENKKEVGRMIREEYFGKESVQDNKKALVEMISDRVF…
mRNA2452	MTDRSALRASLRALLFLGEIIFASSAAQEPTIKIQQGALKGVRLYTDNRIEIYGFLGIPYATPPVGNYRFAAPERHGGWPSDKPYAANEFGPACVQPLQDLIPNFGLKPKQDEDCLTLNVWTAEATITYKNAPVLVFFEGEGFVTGYSGRFPAQDLAAEGLVVVSVNYRLNVFGFLCLENTELRGNVGLLDQYLALVWVRENIEFFGGDPRSVTLMGHSAGATSIAYHMVSPRTQGLFHRAILMSGSALSPWARSSNTTNSSKEIVRSLGCLFPRIQAVLACLRVKSAEEILKAYEMQYNAGNWTELPLPVVDSFLPEIEQYLPVSPEEAFTKGNFLKIPIMTGITMNDGVVTISLWSDLFKQGFFQLKQLITSSIIPSVALKYNLTDTNFEDIQTILQ…
mRNA2563	MAEKDSKSTTTTTPSTATQAVTESNDQNSVFVKRHRRKALVNGLSNSDGTSSFLGIRYAEPPVKRLRFQRPRLWKLKGEVDATKYGPPCPQPHPQKKGSLIGNEDCLFLNVFTPSVPTKNNRTLYPVLVWIHGGNYKTGSGAQYYPTDLVKKGVVVVTINYRLGSLGFLSIKRPELSGNVGLFDISQAMRWVKNYITFFGGNTKKIVPAGQGSGASSATMLALNKFTKSSLSGILAMSGTPISPFALDQNEMETSKDVGSEDKCNVDDRFVKCLQDLPLEDVVRSDFKFAEKKRKKEEFPKGMANLENPGPAEEGADDNRFLPYFIVESPLQAIKKGIFPKIPLMTGVTNEETGGGVKGNFLEDVKKKLLSPNFLQNDIFQSSLVANTGLYVNKTINSQ…
mRNA2616	MLALVFLLCFNSILCSEDVVVKVNEGKIRGIITKTINGRNIFTFYGVPFAKPPINELRFEAPEEPTSWEGVRDASRIKDKCMQCSHFTYTSDTPVVGKEDCLYMNIHTPTLDKNANLNVIFFLHGGAFNYGSGNHISGGYLLDKNDLVLVTVAYRLGPLGFLSTQKKDIIPGNNGLKDQLMALKWIHKNIASFGGDPKKVTIAGMSAGAASVHYHMLSRQSRGYFSRAISMSGTAFNPWARTENSNWKAKRLAKNVGCPAHNIHLMVDCLKKKPAHEIVLQVKSFKTFLYNPITPFGPVVEAKSPDAFIDELPLSIIRNKKAADVPWLVAFNSDEGLYPGAEIIAKSSVMKSLDQNWNDFLPSLLEYEYTLPAQNRSLIAQKIKDHYLKGGNVEGNEKN…
mRNA2660	MRWLLVATVVLGAGASPPPDDDPLVVETDKGRVRGTTLAAPTGKLVDAWLGIPYAQKPIGKLRFRHPRPLDKWTHILNATRPPNTCVQIIDTVFGDFPGATMWNPNTQLSEDCLYLNVVVPKPRPKNAAVMVWVFGGGFYSGSATLEVYDHRTLVAEENVILVSMQYRVASLGFLYFDTADVPGNAGLFDQRMALQWVHDNIHNFGGDPQKVTLFGESAGAVSVSLHLLSPLSNKLFNQAIMQSGSAVAPWAIISREESILRGLRLAEASNCPHSKSDIRAAIDCLRNTNASELVANEWGTLGICEFPFVPIVDGTFIDDHPKRNLASRNFKKTNILMGSNTEEGYYFIIYYLTELFRKEENVYVSREEFIRAVMELNPYVNHVGRQAIIFEYTDWQNP…
mRNA2930	MPPFSWALVPTLLLCLVGVPGHKYSTRVVRTKYGPLRGLLIQHPPVEVFLGVPYATPPLGSLRYMPPVTPSMWRSPRLADTFSPVCPQKEPQVANRTEALLELPRGRVAYLEKLLPLLVNQSEDCLYLNIYVPRGAGGVEHHGLPIILYVHGESYEWNSGNPYDGSVLASFGHLIVVTINFRLGILGFLKTGARGSAQGNFGLMDLVAGLHWLRENMPAFGGDPERITMMGHGTGAALTNFIAVSPVAKELLHRVVLLSGSGLSPWALQKDPLAVKRKVAEQTGCHGDLLEDDLAPCLRSKPLKDLLAVRLDPPRFLPGFAPFVDGAVLSSSLTSTAPETGITAPERHGPGYQLSEFSDRDLLFGLTSTESYLDLSAQDLEFGFNETRRDRILRTFVRN…
mRNA3125	MRAGHWLILLVVIATRVSGGPRYSSRIVETRTGPIRGIILELNSGRLEPVEAFLGVKYATATRYGNAGPVPRWSSTKLADSQPPVCPQAMPDISNKTAALQIMPKNRYYFLKKLAPLLANQTEDCLHLNMYVPGSGSRGIEAPYAVMVYLHGESFDWNSGNHYDGRVLASYGHVIFITVNYRLGLLGFLRAGSGTDSPLAMGDVIAALRWIKENIASFGGDPRRVTLMGHDTGAALANLLLISPQAKGYFTRVALVSGSILSPWAVGQDPIGLREKVGAELGCKTGPNDDLAKCLRLLPLSAILSVRVTSPRFLTGVGPWTKTDPSTAVETSGEPFVGSRLLLGTTTTESFLDFNNQDIQYGIEEDQRNRVLRTYVRNAYVYHLNEIFSTVRNEYTDWE…
mRNA4402	MERSFRRQELKGPLITHAEMKTLIFLVLVEISFGAVIETKIGELRGWEAKSRDGRVYEAYTSIPYAQPPVGKLRLKAPLPATPWQGVLDATKDGPHCVQNLLLMPTIIGQEDCLYLNVYAPKGASNFPVMVYIHGGAFVMGYPGSRDLSEYLMDEDIVLVTLTYRMGPLGFMSLEDKVIPGNYGLKDQALAIKWVSENIESFGGDPNKITVFGESAGGASSHFHMFSPLSRNLIKGVISESGTVNKVWSLGARKGMIAERTRQVAAKLGCESEKSDTILDCFQKSDIKEIMDSMNLFIYWSIDESIPMKPVIEDPSPEAFLTEDPEGFESNMPWIAGFTTGEGLLKSAILNFEPESTIDDFSKNMLDIIPRELSLDLSKPESKVIAGKVAAQYFSRTDR…
mRNA5011	MFRFLFVLIFVVSCTGVQVTVFQGALKGVETKTARNRTFYSFLGVPYAKPPTNEHRFKEPVMVSSWHGVYDASSYSAPCMQYSHMSYMTDSPVIGTEDCLYLNVYTTEIPDIPHEKLRVIVFFHGGAFTFGTGNIQGPHYLFDEADLVLVTVNYRLGPLGFLSTGDDVIPGNNGLKDQLMALKWIKRNIGSFGGDPSKVTISGMSAGGASVHYHMLSPQSRGYFSKAVSMSGSALCPWAQAENVREKAKKLAENLGCPTTNSHTMVKCLRKRPALKIVGQMKHFMPYLYYPFSPFGPVVEHRSPGAFIDEDPIDVILNGKSSDVPWLVSFSSDEGLYPGAEILAENERMKDLEENWSTFLPYLLEYEYTISSSKLTTVSEKIRAHYLGDKTIKENKKGF…
mRNA5587	MKSQTLLLLLFFWSVGCIEQPVVNTKLGRIEGVFLKTISNRKISGFRGIPFARPPVGELRFKPPSPALQWPGVLNASLPSSICLQYDHFLYKTKFAILGSEDCLYLNVFTPKISNFEENLLDVIVFIHGGAFMFHTGNYLGPDYLLDRNVVFVTINYRLGPLGFMSTGDEEVPGNNGLKDQNLALHWVQENIKSFGGNPRKVTLAGMSAGGASVHYHMLSPRSQGLFHKAIALSGTALCPWAQAENVKEKTQKIAATLGCPIDKEMVHCLRTRPADQIVQLSALFIPWLYSPFSPFGPIVEPENPTSFISEQPIDIIKSKKASDVPFLVSFTSDEGLYPGSEILGNENYAKELTENWDSLLPHLLDFNYTIEPERKSSISQKIKLKYLPDGDVLKNKHG…
mRNA5806.5	MLLVLAACVFVSVGGVVLKTDLGDVSGKILKADAGKPYVAFAGIPYAKPPLRQLRFQSPVAIPEDEMRLTNTGTHPACLQLKPIKDVNNTMEAFLLGEEDCLYLSVYAPMASYVEKGKKFPVLVFIHGGGYMSGEPPGSPSRFTDEEIVVVYVTYRLGPLGFAATSDGVFGGNFGLEDQKTALQWVSKYIKYFKGDPENVTVFGQSAGASSVQYHMSTDAKRYFQKAILHSGSLFAPWAASTDAVMTKNTLFLAENLGCSDPSMERVKACMRNMSAESIVDSQKMFRYWDIDPVTIFGPVLTEQKLSESKIPILSGVNSLEGGIKAILLKNASSEKINDFLTNEDEYLKRMMYLDDGEDEAVQDFKRFYLKKVKSKKSLVKALVHFYSDYYFLAPEVAK…
mRNA8045	MDQIAALHWLQENIIFFGGDPGNVTLMGQGTGAACVHFLMTSSAVPEGVLFHRAIMMSGSANAPWSLARQPWRYARQLARHANCSWDQSHAHLLKCLRERPLDLLMSTQVEASPFATTFGPSVDGVVIDTPLERQTSLIGTSSGGKWSNSRGRELGQSHEWGSSRKSLVTKLSRYDLLLGVVKAEAFLAFTGDDVQYGIEPDRRTNILRTFVKSTYRYHLSEILATIVNEYTDWERPVQHPINIRDETLEALSDAQFVAPIVHTADLHSSARRNSFLYVFDYQTKFGDYQQVSYSI
mRNA8490	MRQGCVHGEELAYVFGAPLVGGISHFTKNYTKAEILLSEATMIYWSNFVRTGNPNEPQEADVTHVLRQERNRFKNIEWTPYEAVHKKYLSLDTKPKLKNHYRAHRLSFWLNLVPDLHKPGGDDVPLSHHQLHDDKNQGGQTKKPADPTSSVMFEVYASSIPEHNSSIAQPPLVVVAPSSSERGNHDQQEDGFTAYSTALSITIGIGCSLLLLNVLVFAGVYYRRDKRHNHGHENVQSTAKKRTENGGPMANICVTGGATELLQIMETRNTVMPAPILKQSCETVSLGAREGLILQGSATLPRPPPPPKTPRPPSANSGGPAESQPLLPPHHTATLGRKPKQPLSDELRV
mRNA896	MEIQECLVGLSRFVRISDYRDSGAFGRIIEILGSSVGLSRFRNFWSDYRDSGVFGRIIEIPGCLVGLSRSWGVSSDYRDSLGFRPDYRDSLGYRPEFRDSLVFWSDYRDSLVFLSDYRDSLVFLSDYRDSLVFLSDYRDSLVFLSDYRDPGLFGRIIERLGCSVGLSSVWVVRSDYRASGLFGRIIESGLFGRIIERLGCSVGLSRVWVVRSDYRDSGMFGRIIEILGCSVELSRFWDVRSDCRDSGMFGRIVEILGCSVGISRFFSFSVELSRFWDVRSDCRDSGMFGRIVESLGCSVGLSIVWVVRSDYRASGLFGRIIERLGCSVGLSRVWDPLPPIPWTGIRNARDFGHPCPQYLLFFNILSNITIGNEDCLYLSVYTPGFGKKVPVLVSLHGGG…
mRNA9811	MDLFAMSYVRFVFALGVFTLLKCGDARVARTPLGDVIGNVQKSRDGKEYYAFLKIPYAKPPVGNLRFKNPEPGGAWKGLLDGRERPPFCPQIVIHSPRKPKYVVGEEDCLYLNIFTLSYKLGMKMSVMVYFVGDNFRYGMANDPQLANYLIDENVILVVVQHRLGALGFMSLENDVLPGNFGLKDQAMAVSWVQKYIKYFGGNPQSITVFGDGSGGASAHFLALSHTTKDAIKSVISQGGVANDIWALAKPGKAKETAQKALKILQCDTNVIECLRKKSAQEIMRSEYELIYWDMEPNVVFQPVVEKSKVGSFFYENPLKSNSNFPWMLGFTSDEGQYKIYSMETQKTDELKPFLQNYRNYIKKMLFSSNSSMETVDRLLQRYFINLADREETLKGLKQ…

## Sheet: 4. UGTs
Waiting for Michael Court
mRNA10898		MYFIAFRSVFKIPEIFKFFLIFVTISSCFGANILILVPTPFRSLVFAFKPLFDELALRGHNVTMISPFTFPDDTKIRHIRVKDTSNIIDTQVELLSEQSHWPFFIHFWKMGIDLMDAVLKDEAIINLRDDTHSKYDLIITHSMFVNEPMAAFALKYSCPVINIHPIQLDSWASYLTGNTLPYSYVPNYKIPMTDKMNFMERLQNTLMYTFELLGSMYYYLPTQEAKVKGFFKEEIPPLIEILKNSSLTLLDGHHSVGYKRPLLPNVVQCGGLSLKSGPPLSKEMKKIMDDSKGVVYFSLGSHLNPSKLGQEKIKAFINAFGKLKQTVFMKLNFDIPNKPKNVIISKWLPQTSILEHPKCQLFITHGGLHSLTEASHIGVPLVVMPFFADQKFNLRFIEK…
mRNA10921		MVSPFDFPHDLKIKHLRVNEEPQEEVLSDIIEKISSLPTNFDFMREFWELGIKEMDVVLNEEVIKNLRDDQGSKFDLIISEAMFFQEPLIAFSRKFSCPIINIHPLQMDAWSSYLTGNSLPYSYVPAYKLPFTDKMSFIERLQNTIMFTIELLGTMYYYLPIQEAKMKEFFKMDLPPLIDMLKDSRLTLVDGHFSFGYKRPLLPNVVQCGGLSIKSGKPLTIEMQKLMDDSKGVVYFSLGGHYDLSKLGPEKTEAFMKAFGRLEQLVFMKSNIENIPNKPKNVITSNWFSQASILEHPKCQAFITHGGIHSLSEASFFGVPVVGMPLFSDQKFNTKFIENIGMGINLEEVTENNIFNAIKSVIDDPEYKTKAKRMSKITKDRPQETLDTCAFWVEYVLR…
mRNA10959		MVLNFIIFGSLFVSCFGANILVLLPCGYRSHTLTFKPLFDELASRGHNITMVTPFHFPNDLKIKHLRVNEEPQEKLLNEFVEKLTYLPTSFDYMREFWKLGISQMEVVLNEEVIKNLRDDQGSKFDLIISEVMFAQEPLVAFSKKFSCPIINIHGLQMDAWSSYLTGNSLPYSYVPTYKLPFTDKMSFIERLQNTIMFTIELLGSLYYYLPIQEAQMKEFFKMDLPPLIDMLKDSRLTLIDGHYSFGYKRPLLPNAVECGGLSIKSGKPLNKEMQKLMDDSKGVVYFSLGGHYDLSKLGPEKTEAFMKAFGRLEQLVFMKSNIENIPNKPKNVITSNWFPQASILEHPKCKAFITHGGLHSSSEASFFGVPVVGMPLFSDQKFNTKFIENFGMGITLEE…
mRNA12723		MTLVKNLLITCLLLIIIKDTFGANILAIFTLPVPSHYKVYEPIILELSARGHNVTYLSPFPLKGEVKNLRYIQVENNRGTLTKGGTLNLMMGISPFLLSASVPFMGKTHGDSIYPTKAIQDIVHSSDEYDAIISCTAFLQSSLSALQHKFDAIGIDIYPLGDLSVANLMSGLADNTNYMVDFKATTEKNIHEFNYYDRIYNFCLLLTDHLATMLSFLIYEMQANAYFNYPGFENRPPIKYLMANKSLIITNSHFSIGYPYPKAPHLKEIGGINVKEPKPLPKDIKKFMDEAQDGVIYFSLGTNFNSSWETSHQFRDTFVKVLSNLKQKVLWKWDSDSPPIHSEKIMFSKFFPQADLLAHPNLRLFITQGGILSIFEAVHHGVPMLCLPFIGDQPKNAQV…
mRNA13138		MSNMKYLILLFFSFCFSDASRILAFLPFPAKSHQNVFHPIIEGLAKKGHQITLVAPILLDGKNPNVTQIEVPKNFPGLPAMNLLDLGKRPIPMITREFKRMGIALGEAMYKTEAIQKIIYSKEKYDLIIFETLFVQESAVALMHKFNAPGVDIQPLGESSWLNEISGLPDNPSYMMDFKTLFKDDMTFLERLQSTWATVSTTLLNYYYLMEFQEQMDRLFDYEGWQSRPHISKMVSDKALILVNSHHSTGYPFPRAPHVREIGGVNIKESKPLPNDLQTFMDSAKNGVIYFSLGSNLNISHISNQKITEALIKVFAKLPQQILWKWDSNDIPKASPNVKFSKWFPQQSILAHKNVKLFITHGGYLSTNEAVYNGVPLVGIPFFADQPKKMKHVSSEGYG…
mRNA1613		MGLVRYFLLVFLINLSSGSKILGVFPHFGKSHFLAFQPLMEELALRGHQVTVLSYFPRKTPLGNYKDITIRDPELTTEFLGFHLFENQTENAFSKLMQLKHLREISYEKILKMPEIQQLAKSKFDLVVIELFNTDVFFGLVYKIKAPSIAITSHDIFTWHNGFFANQNPPSTVPTLFSMYSDKMKFPDRFYNTMGYLLSFAVHDWSFHPKDLRLAEETFGEKIDLDGVARNTSLVLLNTHFTIFRSRSFVPSVIEVGGLHVKQPKPLSQDLKKIMDESQGVIYFSMGSVLKGDSLHDKKQQAFIKVFSELKQTVLWKRESPLSVNVKNIVTNGWYPQRDILAHPKVELFITHFGLLGTNEAVSSGVPMVGIPMFGDQHHNGKALESIGVAVSLDFNELN…
mRNA4153		MKLFILIIAIQWSAGAKILAVFPMPGKSHHNVFRPIIIELAKRGHQVTFLTPIPVQNPPTNLKQIVIPNYLAELQGQMNVLEFGKLSVPMNAYMMWFLGNFLGEKLYPGPDFQKIIHSNEKYDAILMEPLFSQDPISALMHKFDAIGIDVQALGDYSWLNEVVGIPDNPSYMIDFKSPYTDTMSYVERLHNFYITFATTLVSYITLLPLQRQMDKYFNYTGWETRPPLRQLMSNKSLILTNSHFSVGYSFPKAPHVKEIGGVNVVPNNPLPKDLQDFMDRGNKGIIYFSFGSNVNASALFSAGKLEELIKNFGKLKQKVLWKWESDKPPKVPKNVKMSKWFPQQDILAHKNIKIFITHGGILSIFEAVHHGVPMIAVPFFGDQKKNARQITSRGYGIHL…
mRNA6396A		MKLVLLFLFGYANAANILIMLPMPLYSHTTNYLTVFKELANRGHNVTCVSPYPQKTPLKNWNDITVKNKLQDLLAGMANFDLTDEPGMIFELIGGWWFFPSLFELTINEEPVQRVIKDTTSSYDLIITETFFGHEPYLALGHKFNAPVVSISAAGITPTIAHYMGTDLPPAYTPNLRLVFNDEMTFLERAKNTFYSYWEIYAANLYYLPKMDSLMRKYFVYPGSEKLPHISDLMRNQSLALVESHLGLHYPRPLHRNIIEVGGINLKDGDNLPEDLKKIMDNAPNGVIYFSFGSAYNFTKLKAPVQKEIISALGKVKQQVIMKYEDSTMPNQPSNVHFRKWLPQATILGHPNCKLFITHAGLHGVMESLHKGVPAVAVPLFADQRFNARFLEKIGVGEH…
mRNA6396B		MRLVFLFLLGCANGANILVMLPVPVYSHSVNYLAAFKELAKRGHNVTCVSPFPQKRPLKNWNDIVVRTTIQDLNAKTGNLDWAETNGLYYELFGRWWLAPIYFEMIVKEEAIQQVIRDTSSTYDLIIMEAFSAQEPFLALGHKFGAPVISISAAGITPVIAHFMGNDFDPAYQPNIKIMADDKMTFLERAKNTFYKHWEIYAANYFHLPNMDALMRKYFVYPGSENLPHISDLMRNQSLALVESHLGLHYPRPLHRNIIEVGGINLKDGDNLPEDLKKIMDNAPNGVIYFSFGAAYNFTRLKNPIQKEIISALGKVKQQVIMKYEYNTMPNQPSNVHIRKWLPQATILGHPNCKLFVTHAGLHGVMESLHKGVPAVAVPLFSDQRFNARFLEKIGVGEY…
mRNA9869		MKLLLIFILAIQWAAGAKILAVFPMPAKSHHNVFRPIIIELAKRGHQITFLTPIPVKNPPPNLKQIVVPDCLAEIHDQMNILEFGKLSVPMNSYMMWFMGNYLGEKLYPGAEFQKIIHSNEKYDAIFMESLFVQDPISALMHKFDAIGIDIQPLGECSWLNEVTGMPDNPSYMIDFKSLYTDSMSYIERLHNAYITYTTTLISYISLLPLQRQMDRYFNYTGWETRPPLRQLMSNKSLVLTNSHFSVGYSYPKAPHVKEIGGINVVPNQPLPKDLQDFMDGAKDGVIYFSFGSNVKVSDVVKSGKLDELTKAFGKLKQRVLWKWESDELPKVSSNVKMSKWFPQQDILAHKNMKIFITHGGVLSIFEAVHHGVPMIAVPFFGDQEKNVRQITYRGYGIR…

## Sheet: 5. P450s
mRNA7262	CYP301A1	Clan mito	MFIFPKRDCGTVWGTRKTEVPGPKPLPIFGNTWRFLPLIGQYKIGEVADISQSLYDEYGRIVKLSGLIGRPDLLFVFDCDEAEKIFRNEGDTPHRPSMPCLVQYKTKVRKEFFGDLPGVIGVHGEPWREFRTRVQKPILQPSVVKKYIPIIESVTEQFIERMLVMKDENEEMPPDFDNEIHKWSLECIGHVALDVQLGCLNPDSPPNSEPQKIIDCAKFALRNVAILELKFPYWRYFPSTLWNRYIENMDFFREVCLKYINKSLENLKTKQKSENEIHDLSLLERILVTEKDPKIACILALDLILVGIDTISMAMCSMLYQLATRQEVQEKMHQELKKVLPDPKTKITAQHIDQMHYLRGFIREVLRMYSTVIGNGRVLLSDTKICGYQIPKGVQLVFP…
mRNA7787	CYP301B1	Clan mito	MISGRLPYRIAFSSKKVNLRRKSSLAVETVSSLTDAVDHVKDYGQVPGPQPLPLLGNTWRFIPFIGDYRISELNKVSERLFNKYGEIVKISNLLGRPDMVFLFEPAAIEKVFRSEDSLPFRPSMPSLDYYKHVLRKDFFGELGGLIATHGEKWNSFRTKVQQPMLQPRTAKMYIGQIEETADEFVQRISEIKDQNGTVPTDFLNEIHKWSLESIAKVALDVKLGCLKEIPEDTQELIHAINTFFKDVVILELKVPFWKIFNTPTWKEYIKALDTITSVAMKHITKALKNLDNKNTQLENDASLLQRVLAQNTDNSKLATILALDMFLVGIDTTSAAVSSILYQLSLHKEKQEILHKEISSVIKQNVRLTSDSYDKMPYLKACIKETLRMYPVVIGNGRC…
mRNA575	CYP302A1	Clan mito	MNTILNVTKSVKAFERIPGPRSLPILGTSWRYLPFIGDLDMNKLHLAGMKKYEEYGELVREEVVPGVYVVNVFNPDDIEQVYKNEGKFPARRSHLGILHYREMRPHIYNNGGLLPVNGSEWWRIRSNFQKSLSKVKEVRMFLNKSDEIFDDFFEKFIRPGKPIDDFLSTIARLNIELTWMALFNKRLGAFEDDNLSADSIPSRLMNSAETANCCILKTDATEPIWKKYKTKKYRLLENCLSFIENIVLKEVTQKQENVLKDKEGDDGFIGQFFSNPNIDIKDINGMAIDLLLGGVDTTSYTSCFIVYHLANNIKAQKKLNEEFSTLLNGAKVTSEILNEAVYSRAILKETFRLNPIAIGISRIMDQDSIMGGYFIPKGTLMLTQNLVACRQEKYFKNAG…
mRNA12969	CYP314A1	Clan mito	MPIIESYLASLAGRFGLRMNGLSDLGFLDFGALALFVLLIFFTELRWHKSKIWGKTAKYLTVKDVPGPLAFPIIGTRWIYYGKFKLSKVHEAYRELFRTYGKIVREEAIWNYPVVSVIDAGDIEKVLRQASRYPMRPPTEITAYYRASRPDHYTNLGIINEQGEAWHKLRSALTPELTSVRTMNRFFPELNNVADDFNRLLMNSIEKESGLVKGFDELACRMGLESTCTLILGKRLGFLDRDVSPLANRLAEAVKDQFCASRDTFFGLPFWKLFPTPAYKKFMASEDTIYDVISEMVDDAEKLEKDTCDIEAVRSVFMAILKAPGLDMRDKKAGIIDFIAAGIKTLGNTLVFLLYLIAKNKKCQEKLYEEINRLAPNGAALDLNFLKEAHYLRACIMEA…
mRNA3159	CYP315A1	Clan mito	MKRLLRKIWNGDTIPTRNGLPLVGTTFSIIAAGSAPKLHEYIDGRHRESGPVFRENMGTDIAVFVSDPATMRFVFSAEGKHPKHFMPKAWDLYNQIHRSKRGLFFMDGEEWSSHRKPLNKHFLKKDVVESLSDVHDAVVSDLVERWRLYEGSTIENLEYEFYRHSLSFVIGSLLGSNYIEKRSEYSDDIGRLAEIFQLIFKTSSKLMMLPVGLAQRLGLDAWKQFETAVRLSLESSRQMVQKMASQRSSDGLLDKMIEENIELDRTVAIVADLLLAAGDTTAYANQWALYLLSKNETCQEEILKNAELTKGAVRETLRLYPPAIFITRYLPENVSFKGYRFNKDELIILSLYTAGRNETVYPNPESFSPNRWLRNGAKLGGVTHLNSFLPFAMGIRSCI…
mRNA4770	CYP404J1	Clan mito	MKAVKPFSSIPGPVALPIIGNLWQYKLGYEDPTFFHDTIEKLHKKYGPVAKEKLGHVDIVHVFSPDDARTVYKHEGKTPHIMPLNDSVFVFRKRANLALGLGNSNGEEWYKLRNSLRHLLLTPKGISNFMKDTDEVALDLIENLKSKRQKNGLVPKLRTELSKWSIEASGLMCFGKRNGYMTEANRKEAEKILRANKSVFYLSTLLKFSFPYYEHYSPIFKELQTSEFRLLGEIKRKTKEALSEIDAMVKNEGNVDERFQLLVSLLKREDLTEGDIYILTQSLFTDGLTTTVPSLIHNLYNLALHQDKQEKAYQEVKQLMKPGDTVSNETLARLNYVRAVVKETFRFYPIGTEISRIVKSDMVLSGYEIPSDTHVNLNMNVNFKSEKYFDDPDSYLPER…
mRNA4168	CYP4-fragment1	Clan 4	MRKATLGSSMHLKKGFEYGALKDGIGNGLVIADLSIWRERRKLLNPLFNHKIIDNKLLKINKQARNLVEALMAHESKPVDIFACTSLSSIQLVCGEGRKKLFLDTLLKSNKKNVYVTESDIRDELLTFIIAEKAYEEQYAIFGDSDRNTTEEDIQNMPYLTKVIQECLRLYPPLPYLSRELEDDVVCGETTIPKGANVVTAPYIIHRQESLYPDPEKFDPERFSPEEIAKRHPCAYIPFGAGPRYCIGQNLAMVNLKVILSAVIRKFKMEKVTERGDFELEILIFLSVNKPIFIKFLPRD
mRNA3986	CYP4C162	Clan 4	MIEFNVEHDEIFTRIVSARMLWGRSSGLCKGWFGTSPYVLVSKASAVEAILSSSKHTEKSNEYSFLHPWLGEGLLTSSGHKWQARRKILTPSFHFRILEDFLGVFVEQSGILCKYLENEVNNEQFNVFPYVARCTLDIICETAMGKKVNAQSDLDSSYVKAVQKMGEIVQKRQAKIWLQPKWAFRLSSLYAEHQRCLNVLHNFSNQVIHDKKEEIKQNERSDLDDLGVKKRLAFLDLLLQASKNGTLLSDQDIREEVDTFMFEGHDTTSAAICWLLYLLGCHPEIQSLVVQELNLIFENSDRPPTSSDLAEMKYLECCIKEALRLFPSVPIFARKISSDVQIGQYIVPKGTTAMIIAYQLHRDPEEFPDPEIFKPERFISRDPKRHPYSYIPFSAGPRN…
mRNA12766	CYP4CM2	Clan 4	MNPILLCAVILLTVFYLFKKYNIKDYVRNTYYLCKIPGPPMIPLIGWTFKVAFLNVEDLHEFLLGYMNYSKHLTKAWIAGLPLCCFKDSEDLETFMSSTQYITKGAHYEPVKSWLNTGLLTSTGSKWHTRRKQLTPAFHFKILEDALPAMNKNSKIFVQKALGKSGKPFEIKRLINLCTLDVVCEAAMGIKLDAQNENSAQYVNDIAEICEIIMKRNLFFWLNKDITFYLTPTGFRFKKVLNRLHTFTENVIKERKKLYIQERHKDLNGKKKKKAFLDCMIELELENPGSFTPEDMREEVDTFLFEGHDTTSAAIVHCLMFIGCCPEVQEKLWLEMDEIFEGSDRDVTSNDLLRMKYLEQVIKETLRLLPSVPIMQRFMEKDFITRKGVLIPKLTNLVI…
mRNA13098	CYP4CN2	Clan 4	MFVEAFLLLGVLFASLWWLTRTDPRIKSYGDKIPGPSGYPFIGNGFTAGFTGTKCIKIHEEFGKKYKGSYRLYMGNILTVVVNTPEDIEAVFSNTDIITKSFQYNFLNSWLGTGLLTSTGQKWHTRRKIISPTFHFKILDDFLAVFNRHANSLVERLEKKANGEDFDVGPFVKKCALDAVCETAMGSANKYDSKENANYLLAVEKICQVLVERMNKPWLYNDTLYAIFGRYFEEKSLLTTLKSFNDKVIADKMKELNFGKDEENEDEFGIKKKTGFLEQLLKIRAESNNSLKTDDDIVEEVNTFMFAGHDTSATSLCWTLHMLAQNPDVQEKLYQELHTAFNSSMDFVRDDLNEMKYLERVIKESHRLCPPVPFVGRNVSQDFKLPSGYLIPKGAMIVV…
mRNA1627	CYP4CP2-fragment	Clan 4	MIVGNYSRGVKFGIPTELIILFLETSMGINVEAQNEKSNYVSAVRKITSLYAEKIRLPWLHFDFMYAILRSNTLLKNLIKTLHQHTLKVIREKEEAMTKEKDDVVEDDTGIKKKIPLLETLLKLKNVDSTFKTDQDIREEVDTFMFEGHDTTASAITFIIHNLAQNRKVQDTLYEEVASVLRDKSEPSYEDYQEMKYLDRVIKESLRLHPSVPIVGRTITHEITLKSGFTLPVGSYLFMSFYFLHRNPKNFPNPEEFNPDNFLPEAVAKRSPFAYLPFSAGPRNCIGQKFAMMELKSVISKLILQYTFESDEAPVLQADIVLTSVNGVKIIVKKR
mRNA9029	CYP4EL2	Clan 4	MWKKNQDIQSINNVVTYEFKIMFLILILTLLFVLWVKFKADNRIVRLSSDIPGPPTLPLIGNVHLVPPNGKDGLNLRARLIKEYGNVVRIWIGSLLIVFLSDPKDCEVVLRDTNELTKSNIYNFLHSWLGLGLLTSTGEKWRHRRKALTPAFHFTILEQFIDVFNKNGRILVECLEGFDHNGSDIQPFISRYALDVICETAMGTQINAQKNVHSPYVKAVRKMCNLISGRIRKPWIYPNFLWSLLGYKKIEDELLATLNSITNEVLKENENNQEEYSEDNDLGLKKKTAFLKLLLKMKKEGSNTFKTDSDIREEVNTFMFEGHDTTTASICFTLSLLVKHPHIQELIHDELKTMTTKTSNFTHEDLNEMKYLERVIKESLRLFPSVPVIDRKLDKDMKI…
mRNA9030	CYP4EL3	Clan 4	MLIIVLVVTLILVLWLKFKADDRIVKLSANIPGPPTLPIIGNIHQIPKNGKDTLVKRGEWFKKYGPIVRLWVGSTLWVLLSDPNDLEVVLKDVDAQAKQSRVYSFLQPWLGFGLLTCAGELWRNKRKALTPTFHFSILEKFLDVFNKNGRILIECLEKCDQKKVNMQTYISRYTLDNICETAMGCKVEAQTNQHSPYMKAVEDYIHMLMSRNRRPWIHSEFMWSALGYRKQADRILIKLNSITNRILKDNQSLYNDENIGAKKGLKTAFIELLMKMRKEGSTTFQTDGDIREEVNTFMFEGQDTTAAALGFTLNNLAKYPQVQETIYDELKTHFSKTDDFKMEDLQEMKYLERVIKESIRLFPSIPFIERNLLKDIKLPSGYILPAGTEIAVSIFYTNR…
mRNA3813	CYP4EM12	Clan 4	MLTEIFLVFFIIGIILVYALVPWERGAGFRTMKYLRDVPGPKSNPLFGAGFDIVKTKPHELLDFLINLSKEHPRLCKFWVACLPFVIVSQPEDLEVIMGSVHHIEKGLEYNSLLPWLNEGLLVSSGSKWHSRRKLLTPTFHFKILQDNLSSLNKHSRRLVRNFLQDKDEEIEVEKYITLCTLDVICDTAMGIQLNSQENEGSEYVETVKTVSSMVVKRLLRFWLFRLAIFNLSSLGREFKKHLKILHDFTEKIIYERKEQYATNITSSNEDDSLGKKRKAFLDSMIEMDLKHPNTWTVQDIREEVDTFMFEGHDTTSAALIFGMYLLGHHPDIQEKAYQEQYSIFGDSDREVTKQDLNEMTYLERVIKEILRLYPSVPYLSRMLTTDALLNDGLVIPEG…
mRNA3798	CYP4EM13	Clan 4	MFLLILLLTILIGALIIYVIPFERTAKIFLNYDVMTKLIALPGPKTWPFFGIGFKLRKLKENEILPFLLSLIHDFPRICKCWVVSLPLIFVNQPEDIEVILSNVKHINKGYEYFSLVPWLNEGLLLSNGGKWHKRRKLLTPTFHFKILQDNLSSLNKHSRILLKKMLTKKKDIDVHDHITLCTLDIICDSAMGIDLNSQENQETDYVKAVKSVTYAIVWRSLRFWLSRDNVFYQTKIGRDFKKEMKVLHNFTEEIIGERKQQYLRTSSVDEDDGFGKKRKAFLDSLIEIEMRNQNTWTIQDIREEVDTFMFEGHDTTSSALTFSIYLLSLHQDIQEKVYQEQYSLFGDSDREVTNKDLNEMTYLEKVIKESLRLYPSVPYLSRWLSHDAVLNDGTVIPK…
mRNA9813	CYP4EM14	Clan 4	MLLVILITIILICLSVFFIPFEHTSKGFFNIDALLKFNRLPGPKSWPFFGIAMRLSRLTENDLVPFWAEMFKNFPRICKLRAVGVSAVYISEPEDIEVILSNVKHIDKGIEYLNLPSWLNEGLLISKGTKWHKRRKLLTPTFHFKILQDNLSSLNKHTRVLLKKMLSKSGESIDVHSDITLCTLDVICDSAMGIDLNSQKNEGTEYVEAIKSVTFYIVWRVLRFWYARNCVFYLTKIGQKYKKNLEILHKFSEKIILKRKEEYANRDLTEDDDDGFGKKRKAFLDSLIEMEMKNPNTWTLQDIREEVDTFMFEGHDTTSAALTFSIYSLGLYPNIQEKVYQEQYSLFGDSTREATNHDLNEMVYLEKFIKETLRLYPSVPYISRELTSDAILNDGVVIP…
mRNA11897	CYP4G275	Clan 4	MEEWTVTMNLLALSVTLGVVYYFYWRFKRSRLYELASQIPGPDGHPLIGSALDFMGTPDKLFKVLTGFVETYKDVAKAWIGPRLLVFLTNPADVELILSSSEHIDKSPEYRFFEPWLGDGLLISTGEKWRTHRKLIAPAFHLNVLKSFFPLFNKNSKDVVNVLKAQSNKQIDCHDYMSETTVEILLETVMGVSKKTQKSGYDYAMAVMKMSEILHIRQTKLWYRPNVLFNLSKYSKVQKKLLDTIHGLTTKVLKIRKDNFVTSGKREFEGLSTEDDVEIKTQDNKVTDLSFGMNTKIKDDIDIDIGEKKRLAFLDLLIESSENGVVMTDEEIQNQVDTIMFEGHDTTAAASSFFLCMMGARPDIQAKCIEEIDRIFGNSDREVTFQDTLEMKYLERCIM…
mRNA4143	CYP4G276	Clan 4	MFYILLSLAAAAGVAYYIKWRSERKELYELAAKLPTEEGLPIVGVALRFLFFDHNKVLEYLYQMSLKEKFKDVAAVWLGPRLMVSVHNPKDVELVLGSTVHLKKSVEYRYFQPWFGNGLLISDGDIWKSHRKMIAPTFHLNVLKKFMIDFNYNSKRLISRLASLEGKEFDCHEYMSECMVETLSETVMGVKQEGKGRSCLTYAMSVMKMCDILHTRQTRLWFRPDFLFRWTQLRKENDSHLNIILNLTSNLVRKKKELYDHNKVSVPTNVKENEIKSKKETSPKDKFEFGLATGLKDDIDNDDCDIGEKRRLPFLESMIERAHKGDGMSDIEIRDQVNTIMFEGHDTTAAASSFFMCVMGAKPEIQEKVLQEIDAVFGDSDRDVTFQDTLELKYLERCL…
mRNA9303	CYP4VP-fragment1	Clan 4	MKDWMFKLTPLGKFFDHYLNINYDYTRKVIRERVELKGEKSINYNESVDRDLGIKEKKPFVDTLLEGDSILYNSENKMITEISALLFAAHDTTAVTLTYVIFCLANNKEIQKKVFEEQESIFGTSKRDATPPDLKQMTYLSQVLKESMRLYPTIPYLSRELEEDDTLVPKGSNVLILPLAVHRNPKIYPEPEKFDPERFLRTSAEKDILTPTYHSAPDPGIVKVKNTPS
mRNA561	CYP4VP1	Clan 4	MVALHEPEYIKEVLGSDRHLKKGWEYDYFKTWMGNGIFTTYGDEWKKRKAIFSIPLNYKLNDKIGYINNHANDLVENLLKQNETNVNVIELMAICSLHITCETIMGVKMDEKSEEGKNYVKSLKYILDCVCYRILNGIYMKEWMFKLTPLGKFFDHYLNINYDYTRKVIRERVELIGEKSINYNESVDRDLGIKEKKPFVDTLIENKTTENKMITEISALLYAAHDTTAVSLTYAIFCLANNKEIQKKVFEEQESIFGTSKRNATPQDIKQMTYLSQVLKESLRLYPTFPYISRELEEDVLCDDTLLPKGSNVIILPLAIHRNPKLYPEPEKFDPERFSPEECRKRHPYAYIPFSAGPRNCLGQKYAELTLKVVLSTVIRNFEIEAVTKPEDLVLKMAI…
mRNA551	CYP4VP2	Clan 4	MILTFLFLLLTLILSLIYFIRIPSYRTYKLAQKIQGPNKFSILGITFDLAQLDATTILTYFLKCAEKYPKIGRYWLLGVPMVALYEPEYIKEVLGSDRHLKKGWEYDYFKTWMGNGMFTTYGDDWKKRKAIFSTPLNYKLNDKIGYINNHANDLVENLLKQNETNVNVLEHIAICSLHISCEAILGVKMDEKSEEGKKYVSSLKYILDCVCYRVLNGIYMKDWMFKLTPLGKFFDHYLNINYDYTRKVIRERVELKGEKSINYNESVDRDLGIKEKKPFVDTLLEGDSILYNSENKMITEISALLFAAHDTTAVTLTYVIFCLANNKEIQKKVFEEQESIFGTSKRDATPQDLKQMTYLSQVLKESMRLYPTIPYLSRELEEDVLCDDTLVPKGSNVLI…
mRNA11660	CYP4VQ-fragment1	Clan 4	MGVTFNEEEPKFQNYVDSLKYVLESLVYRVMHGIYMKDWMFKLTTIGKSHDHNKKRFHQFTENVVCERKATIARENINNDEDTGLKNRKAFLDTLIELQSSKKCYLTDNEVKEETEVFMLAGHDTTASSLTFAILCLANNPHIQEKAYEEQYSIFGDSDRSVTNDDLHEMTYLTQIVKETLRLYPSAPYTSRELVYDAICGETIIPKGSNVLIIPYATHRDENLYPNPEKFDPERFSPEETEKRHPYAHIPFGAGPRSCIGQKFAMAVLKVILSSILREFKLEPVTRVEDVVLTMEIVLGTKEPILAHFLPRKNLSNFINLKNVCLEKSIQ
mRNA14202	CYP4VQ1	Clan 4	MSFVVTCALSIITIILLGISFLAYIIRFPSYRTYKMVRKLSGPNKYSIVGIAFDLALLDITGALPYIKKLSDDYNGKARVWILGIPMILLSNPKDVEVILGSMNYLRKGFEYNFLRPWLNEGLLVSDGEKWRGRRKALTPSFHFKILENNVLSINKHARTLVESLTESHEPVDVLALISLCTLDVICETAMGVTVNAQSQIGKDYLKSIKYVSEGVAFQILNLYLKSWMFKLTPYGISYDYHQKQLHDYTEKVIRERKAIYVAKKNDQKTDDFGRKEKHAFLDMLIELQSTKNGVQSDLDIREEVDTFMFEGHDTTSSALTFALLCLANYKDIQEKVHEELLSIFGDSDRAAESADLQQMTYLTKVIKETLRLYPSVPYMSRELVQDAVCGDTIIPEGS…
mRNA10389	CYP397B5- fragment1	Clan 3	DFEHFADRSRISNFHDTDEIMTSIFFGDAPRWKPMRMAFSHLFTPRRLKSMTDKMTDIIKSSTSKFLEVAKNDEDIDGEKILSSIFMDVITLSFIGIGLKNQDVFHHVSHYTNFPTFFGSLKVLLYNLHPQIYDFFRMTSANKKIHEVFTELVKEVLEEREKSNYEGDDFFEFLIKCKNGENKYVD
mRNA6104	CYP3085E1	Clan 3	MLLLLFLCSILFFIYYQIVWNYWKRKGLKQGKNLPLFGSFLKVFLCLECKNDVYDRIYKKYPEEKYVGVYEFGRPVLVLKDLKMIQTVLVKDFGFFVDHPQWVFNKECFVHFGTFNLRGDLWRAMRYKLTPTFSAARLKSILPRIDKILNDPGNQKVEMRRYLDLCSADAIAAFYGTEIDNKDEFQNLVSILSEVDVPRYYKLMVLEFFPKIGSLLGLNLVPKAKDIEFRKLINEMVRLGGSEFSKLLSDMGSKIEMKSKDFDSTGVQKGQHIFEVSEELRMGQAAQFLVAGLDTTSNTMSYVAYDLCTNLEKQNIAYKEVSDAVHKHGGFTYEALLDMKYLGACLKESARLHPVFPFAFREATRDYVFEDGLKINKGTKIIIPSLSLHMDEKYYRKAE…
mRNA7879	CYP3087B2	Clan 3	MQKYIESLINKNGGESTGEIDIKETMSKFTLDVIASTAFGVTCNSFTDEKSEFAEKISKFNYIPKFKRFLFLLTLIFNVPTKIRDLLPISFFNLETVNYLANIIKETTKYRLENKVRRNDFLQLLMDAQKISSENGDHVDKNDEAISEDVAIAQSVLFFIAGYETSSTLLTMACYELAQNLPEQDKLRSEVREKIEQNGKLSYEDLNDLPYLDKVLSETLRLHPPVSRLDRVCTKDIKIGKVDLKKDEKICIPVFGLHMDPKYYPDPHLFNPERFSEEEKSKRHSYVYLPFGQGPRNCIGMRFALMSVKLCLAYLVNNFVMNSCPKTEIPFKYDKRSMLLKSDGGVYLQFFPC
mRNA3187	CYP3090A4	Clan 3	MDLNAILLLLLFVFFLLFLYVRWNDNYWLKRGIPFIEPGKIFGNIREVVLMRKTIGQVYREIYKKLGDKPLGGFFKLRQPMLMIKDPELIKEVLSAKFDCFNSNDINVRRDTNPILKMNPLLSSGATWRSTKSVLTPLTHDKTLDGMFDITRIISQDMVATMKIHPLLPVECKKLSARYITNVIASCALGMETSTYKKENPEFSQMVLKIFRNTVKSNIALLFALYAPSLSNWFHYRFIPKKISHYFISLISNMCKYRVKESVERNDFLQHLININKESEAIGEGTVYDYDKITSYCMTILLNGYFMSNSPLYYCLYEIASNTEVQRKLKEELKENNITDMEEFSSEKMKDLEYLEMVLSETLRLHPPVQVITRLCNKEAVLTKDGIEYKIEPGTPVTI…
mRNA6308	CYP3091-fragment1	Clan 3	MSKKLFLDGLLTNLAFSWFTIAPKFASLLKIKLMNPEVIEFVKGVVKDVFEYRMKNNVVLNDYIGLFLEENKKSNHPISFNDIAAHTMTFFIDGYETSSLAMSFMIHLLAIHEDKQQKLRDEINSAEDLDYNTVITLPYLDAVIYESLRMFPPLGAFNRTCTKEITLECKGRKYHIKPGMNVAIPAFALFQDPNLFPEPQVFKPERFYKKPLPPHLFPFGIGPRMCMGQKFALTQIKCSLSRMVKEFRIFPADEKSTRMAEIDEKVFFTNNSKEPMNVKFEKIN
mRNA6296	CYP3091E3	Clan 3	MIDALLIILALVIIIYLYLTWNHDYWKKQNVVFRKPSLFLGNSKEIMLGGDNMGKIFQRIYNEYPDEPAVGLFKFRQPQLLIRNMDLIKTVLIKEFNSFHDNDFYVDKKTDPVLGLNPFVTKGEEWKKVRSIHTHKQTSGKIKTMFPLIGNVGKDMLKFIEENKGKEFEAKYFSGQYTTDVVGSCVYGLHTNSFLDPNAKFRQISEKIFSDDFAFNIKILLTSLVPSVVSLLNIKLISSDAVNFFNGVVSDVYDHRIKNNVNTNDYIGSFLEENKKSDQPIHKKEEIMAHTLTFFLDGYETSSTLMGFVIYLLALHQDVQQKLRDELTDAENCEYDTIHSLPYLDAVINETLRMYPPGAFMNRECNKEITLSAEGKNYNIKPGMTVVVPALAIFNDPKY…
mRNA6247	CYP3092F1	Clan 3	METLEIALALGITAIVLLITFLYYKISSSLSYFSRRGLPCLSYSESLKFGLSLISARLNLEEFLSLVYNRIGEHKMGGHFNYLNFSPIISIKDPDLIEKVLIKDFSNFTDHFNLENIEANPLASNLFNLTGQKWRTMRNKLSPIFTTGKIKWMYAQVIDCGDNLVEYFDKIATGDDVQIKETLSFYGLDVIGSCAFGLDTQALKNQDSDFVKMVHKIFRPSIMQLLRAMFIGLLPKVAKFLRIKSVDQDVLDYFVGLTRDTIESRIKNNTKRNDFVQLLLQLKQQGHVEYDDTEKEESSDPKETFELTDDVLTSQLFIFLLAGFDTTSTTTSYVLYFLSVDQERQNKLRDEIKKINAPLTYEAVNNMTYLDHCISEALRLMPPASMLIRNTTKDCQLDG…
mRNA1253	CYP3096-fragment1	Clan 3	MDDLGSIQGLEKTLRLYPPVTGMIRIASSDIKIPDSEIVIKAGEGVAACFTGIHKDPHLYPDPEKFNPDRFDSPIPDGAYLPFGAGPRICIGKDLAMLELKMALSHIVLNFDIELDTQKTPSKLEIDPKNLFFAVKSGIWIKFKKIVQ
mRNA810	CYP395A11	Clan 3	MSNILLALLCIVASLLAYFYYKIKKIHETWSSRGIPHEKPVFFFGNSLRTIFRYANQGERYKEVCDQFPDAPFIGFYEFLRPQLLVKDSEIIEKILIKDFGHFVDHGFEMDENKNPLDISLFTMTGKKWKALRNKLTPIFTTGKLKIMYDQMNGIGQNMDKLLEKEMKCLELREITGRFAMDVISSFAFGFDAGNLANPDSEFRRMGKKSFEMDMIQLMKFFLLMSCPDLAKKLGIGFTQPDVQKYFVNIIRDTIEYRKKNNAKRNDFVDLMIQIKEKGSVEITTKDPGDDYLGIDEHYVTDSFDLTEDLIVGNSFVFLTAGFEATATSMTWACYELAQNEKIQDRLRQEIVEKVKEHGGLSFDAVKDMEYLEMTMKETMRKYPPAQALFRVCTKEYSL…
mRNA811	CYP395A12	Clan 3	MNKQVSYSVLLKEICDKFPDAPFVGFYEFTRPRLLVKDSELVEKVLIKDFQHFADHGFEMDETKDPLDITLFNMSGKKWKAYRNKLSPVFTTGKLKIMHEQMNAIGESMDKWLDEQDLTGLELRDIMGRFAMDVISSFAFGFDAGSIANPDSEFRRVGKKSVEITKTQMAKFIFMACCPDLSKKLCLGFSRADVRDYFVNIVKDTMKYRTENNVRRNDILDLLLQIKQKGSVEITTKDPGDDYLGIDEHYVTDSFELTDNLIIGTAFGFLTAGFEATAISMIWACYELTQNEQIQDRLRQEISEKVEKHGKLDFEALKEMQYLEMCLKETLRKYPPVGGLLRVCTKEYEFPGGYLVKKGDSVMIPVHAIQHNPDYYPDPEKFDPERFAPDVSQRPCTFL…
mRNA809	CYP395A13	Clan 3	MSNVLLALLCVLASLLIYVYYKVKKIYETWSNRGIPHEKPTFFFGNSLNVFLMRISGSERQKEVCDKFPNDPFVGYYDFLSTQLMVKDSEMIERILIKDFHHFVNRGFEVDETKNPLDVSLFNMEGKRWKALRNKLSPIFTTGKLRKMHEQMVNIGANIEKLFEEEDLKGLEIRDIMGRFAMDVIGSVAFGIDAGNLANPDSEFRIMGKKSFEFSIGIMLRFLIIMNFPWIAKKLGLGMGRKDVQEYFVKIIQESIDHRKKNNLKRNDFLDLMVQLKEKGSVEITTKEAGDEYLGIDENYVTDSFNLTENLIIGNAFVFLTAGFEATALTLTWACFEISQNDSIQDRLREEISQKIKEHGGFHFDAVKDMEYLEMCMKETLRKYSPAQGIFRKCTKEYT…
mRNA1580	CYP395V1	Clan 3	MQILLSLLAILISIVGYVVYLSKKANRYWKEKGIPYEEPYLFVGNALDLVLMRCTQGESMTKICQKFPKEPVVGYVSFFKPVLMVKDVDYIEKVLIKDFVHFMDRGIELPNSLSPLQVNLFNMTGNKWRATRSKLTPIFTSGRLKSMFNNMTDIGADLNNAIENEKKECVDLKDIMSRFAMDTVGSYGFGINPKSLKTPNQEFEKMGKLVLNFGPWEFIKFLLAIYFPYISMKLKLFFIRTDVQEFFGKIIRKVVNERVENKVQRNDFVDLMLQLKNKGKIEIVTKDKSDDYLGDYEEKPNEKYVVEITDDFLIGQAFVFLVAGFDGFASVLTYMLYHLSKNQDIQEKLRNEITQKIKEHGKLNFDTIKDMTYLDMCLKESLRKRSPAQVIFRVCAKEY…
mRNA1612	CYP395V2	Clan 3	MQVLWVLLGILISIFGYVVYLSKKANSFWKERGIPHAEPYLFVGNMLDLILRRSTQGQLMTKICHMFPDEPLVGFVSFFKPILIVKDADYIEKVLIKDFNSFLDRVDNTAGEFHPMQTNLFNMTGDRWRATRSKLSPIFTSGKLKNMFNNNMDDIGTDLEKAVVGKKDCVDLREIMGRYAMDTIGSYGFGINPKSLENPNTEFEEMGKNVLNFGPWEFIKFLLLVYFPSIALKLGLFFVRTDVQNYFMGLIRKVMAERTKNNVKRNDFVDLMIQLKEKGKIEIQSKDQSDEYLDINDGRENLDIKITDDFVIGQSFVFLVAGFDAIASSIAFTLYELSKHPEIQSKLRKEILMKIEEHEKLSFDTIKDMKYLDMCVKESLRLWSPNQDIMRECNEDYTF…
mRNA2555	CYP395V3	Clan 3	MSVLVALLTVFVSVILYVAYLSKKANNYWKEKGVPYVEPYLFVGNALDVILMRKSLAEAMFNVCQRFPDEPIVGFVSFIKPTVIIKDPNYAEMVLVKDFSFFMNRGFEVSEGLNPFQMNLFNMTGDKWRIFRQSLSPIFTSGKLKKMFSNINEIGDDFDKAMDSIQKECVDLRDTMNSFTIDTLGFYGFGKNPKSLLNPDNEFKKNGSKVFDFGISQFIKFMINVYFPYLTKKLGIFFIDSKVQKFFIDFIANTIDERAQKKVERNDFIELMLQLKNKGFVEIQSKDSSDDYLEIQDIKTTEKIEFTDDLLLGQAFVFLVAGFEAFSTCLTLTFRELSQNQDIQDRLRAEINEKIEKHASINYDAIKDMVYLDMCLQESFRRYPPVQELFRVCTKRYTF…
mRNA9685	CYP395W- fragment3	Clan 3	MGYVFWTLTFGVVSLLVYLFKKALDVNKKFEKLNIPHKKPYPIVGNTWNLIVRKVSQGQFLREYCGQFPNEPMIGLYQFTTPILIILDPYYIEKVMIKDFQHFVDRGFPVDDDTNPVDLNLFSMSGKK
mRNA3375	CYP395W-fragment1	Clan 3	MEYVEMCLKETMRLHSTLAGLGRMCTKAYTFPNGVTVQPGEGVMIPAIFVHMNPSIYPEPEKYDPERFSPGVSRPPCTFLPFGDGPRICIAMRFAMLQMRFCAAKMLSEYKFKVNPKTVTPPVISTTSLFGTPSTPILFDLEKV
mRNA1879	CYP395W-fragment2	Clan 3	MLMGYVFWTLTFGVVSLLFYLFKKALDVNKKFEKLNIPHKKPYPIVGNAWNLIVRKVSQGQFLREYCGQFPNEPMVGFYQFTTPILVILDPYYIEKVMIKDFQHFVDRGFPVDDDTNPVDLNLFSMSGKKWRAMRNKLSPIFTTGKLKNMFPQIVDVGNILGSAVEKENKEGLEFKEILNRFLMDSIGSCAFGLEPTNLDEPDTEFVRMAKSVFEVKLTTFIRMTIMFTFPRIAKFFRLATFADRDAQNFFCRIIRETVEFRKKNSVKRNDFIDLMMQLKDKGNIDIQTKDPKDDYLDVDSSTTSSYGNYLAEFQNYHHFTRSSFPTLFWLSH
mRNA8111	CYP395W1	Clan 3	MSAVLWTLASIFAALCFYIYRKASEINKTFARKNIPHDKPSLFVGNAWRFVIRKEFQGVYFRRLCEKYPDEPIVGYYEFLRPILLIKDPLYIEKVLVKDFHHFVDRGFPIDETENPLDVNLFSLTGNRWRALRNKFSPLFTTGRLKVMFHQIVNVGGILGRAIEKENKKGLELKEILGRFSMDTIGSCAFGLEPTHIDQPDTEFIKRGKSIFTLTLSRFIRFLLVINLPKVAKLLGLSGLSDRPTQNFFCDIIRKTMNYRAENNIKRNDFIDLMMQLKEKGHVDIMTKDPNDDYLNIEEKYKTSSYEITDNILIGQAFVFLTAGFEATTVAINNVFYDLSINPEAQEKARQEVLRCIEKNGGVLDYESVKEMEYLDMCLKETLRLHSTLPQIGRVCTKK…
mRNA592	CYP395W2	Clan 3	MGVILWTLASILAALCFYFYRKASKINKTFAQKNIPHDKPALLVGNAWRFVLRKEFQGVYFRRLCEKYPDEPLVGYYEFLRPILLVKDPLYIEKVLVKDFHHFVDRGFPINEEENPLDVSLFSLTGTRWRALRNKFSPLFTTGRLKVMFNQIVNVGDILGRAIEKQDKKGLELKEIFGRFSMDTIGSCAFGLEPTHIDQPDTEFVVRAKSIFTLTLGRFLRFLIIINLPKVAKLIGLGSGLSDRQTQDFFCDIIRKTMAYRAENKVKRNDFVDLMMQLKEKGQVEIMAKDPNDDYLNIEEKYKTLSYEITDNILIGQAFVFLTAGFEATTVAINNVFYDLSINPEAQEKARQEVLSCIKKNGGVLDYESVKEMEYLDMCLKETLRLHSTLPMIGRICTK…
mRNA6238	CYP396A2	Clan 3	MSSLSWSLFAILAALLYYFYTWSKKKHEYWKKKGVKYAKPVPFFGSLLPAVLTQKPNNYIPFDVYHAFPEEKMVGYYCFTRPALVIRDANLIEKITVKDFQHFVDRPHFGIEKNCTLSKALFSLSSKDWRNVRYRMSPGFSTGKLKFIYNHMDECSDALIQRITKSQKNNDINHNLRHYALHTLSSGVYGTEVKDESAVDDFAQMSNLFFESSKPTILRQLFMKYFKNAAEFLNLSFFNGDPETYFKTLLSNTFEFRSKSNVRRNDFTDFLLKLKSKGKVEVIEKNADDAYLTMEHNEDVETFEFTDEIINAMALQFIMAGFLPLVQVSLYTLFELSLHTEAQKKAREQVDEMYAKHGGFTYTSIRDMTYLDQCIYEVLRIHSLVDNLERICTKDYTTD…
mRNA2056	CYP397B1	Clan 3	MSVLIGLVCVLVALLWYYLKRRFSFWRRQGVEEWKATSIFGNFGQVFAFKENEADVTDECYRRLKGPFGGYYFLWKPLLMVKDVELMKNIFIKDFDHFADRPRFMNFHDTDMIVRSLFFMPAAPWKPLRMAFSHLFTPKRLKSMSEQVGKVCQTSVDKFVTSAKNGNDINLDSDLNDITMDVITTSFIGISLQDKKTFERVSSYFNYLGAFDTFKGVLCTVHPEIYNFFRMTSLDKRIHGLFSELVKDVVAQREKSKIATEDLFEFLIKCKNGENKHIEGMTVEEMMSHVFVFFFAGHDTTAATTSFVLYELSKNLELQNRLRNDIQEAIEKNNGLTYSAVKDVPLLEWTIKEATRMYPVLGVLKRVCTKPYKFNDFDIPVGTEIILPCRSFHYDPKYF…
mRNA2071	CYP397B2	Clan 3	MMSVLVGLVCVLVALLWYYLKRRFSFWRRHGVEEWKATSIFGNFGQVFAFKENEADVADECYRRLKGPFGGYYFLWKPLLMVKDVELMKNVLIKDFDHFADRPRFMNFHDTDMIVRSLFFMQAANWKPLRMAFSHLFTPKKLKNMSEQIEKVCKTSTSKFQTLAKNDEDVDLDLNLNSITMDVITTSFIGISLKDQKTFKTSSDYLNFPGAFDTFKGVLCSVYPNIYNFFRMTSFDKRIHGLFYTLVKDVVAQRETSKIVSEDFFEFLIKCKNGEIKHIDGMKDEEMVSHIFVFFFAGHDTTAATTSFVLYELSKNLELQNRLRNDIQKAIEKNNGLTYSAVKDIPLLDWTIKEASRMYPVLGVLKRVCTKPYKFKDFDIPVGTEIIIPCRSFHYDPKY…
mRNA3518	CYP397B3	Clan 3	MTLLVSLLCILVVLVWYYLKRRFSFWRRHGVEEWEADSLFGNFGQVFASKRTVADVADEFYERLKGPFGGYYYLWKPLLMVKDVDLIKKILIKDFDHFTDRPRYMNFHDTDVVVKSLFYMEESPWRAFRTAFSSLFTPKRIKMMAEKVEKVCKTSTSEFLTKNGEDVDLETHLNEITIDIITKSFFGISLHDRKTFYTVADYMNYTGTYKIYKSLLYQLYPKVYDFFRMTSLDKRMFGLFYELTKNVLEERKISNVESEDLFDLLIKCKNGENKHVEGINDKEIASHLFSFFFAGYDTTASTTSLALYEISKNRDVQNRLRNDIQSKVDKSDGLTYEAVKDIPYLDWAVKEAARMYPVLGVLKRVCTKPYKIQDFEVPLGMEIIIPSRAFHYDAKYFEN…
mRNA10677	CYP397B4	Clan 3	MALFVTLLCLLIALVWFFLKRRFSFWRRHGVEEWSATSIFGNFSPVFSSTGKNEADIGDECYKRIRGKFGGYYFFWKPILLVKDPELIKNVLIKDFDHFSERTRISNFHDTDEIMTSLFFGETARWKPMRMAFSHLFTPRRLKSMTDKMTNVIKSSTSKFLEMAKNDEDVDAETVLSGIFMDVITLSFIGISLKDQEIFHLVSKYTNFPTFLDSLKTLLYTLHPQIHDFFRMTSVNKKIHEVFTELVKDVLEERKKSNYEGDDFFEFLIKCKNGENKYVDEISDAEIASHVFTFFFAGHDTTASTASFILYELAKNPKIQTRLRDDIQAAVNKNNGLSFDAVKDVRYLQWIIQEATRMYPVLGVLKRTCTKPYKFGDFEVPLGTEIIIPNRALHYDPEY…
mRNA10408	CYP397B5	Clan 3	MALFVSVLCLLIALVCYYLKRRLSFWRRHGVEEWSATSIFGNFGPVLLSKGKNEADISDECYKRIRGKFGGYYFFWKPILLVKEPELIKKVLIKDFEHFADRSRISNFHDTDEIMTSIFFGDAPRWKPMRMAFSHLFTPRRLKSMTDKMTDIIKSSTSKFLEVAKNDEDIDGEKILSSIFMDVITLSFIGIGLKNQDVFHHVSHYTNFPTFFGSLKVLLYNLHPQIYDFFRMTSANKKIHEVFTELVKEVLEEREKSNYEGDDFFEFLIKCKNGENKYVDGISDAEIASHVFTFFFAGHDTTASTASFVLYELARNPKIQTRLRDEIQAAVAKNNGLTYDAVKDVAYLQWIIQETTRMYPLLGVLKRTCTKPYKFDDFEVPLGTEIIIPNRALHYDPEY…
mRNA2072	CYP397B6	Clan 3	MALFRRFSFWRRHGVEEWKASSLFGNFGPVFLSSGTNEVDIADECYKRTNGKFSGYYFLWKPILLVKDAELIKNVCIKDFECFPNRPRFLNFYGTDEIAKSIFFMESDEWKRSRMAFSHLFTPKRLKSMADQIEKISIDCKSRFLKMAKNDEDVDLDTIMYSITMDVITKSFIGISLNDQKIFHTVSKYTNFLDFSDLLKSLLYTIYPQIFNFFRMTALNKEIHQLFTSLVKDVLEERKKSDASSDDFFEFLIKCKNGENKHLDGMSDREIATHVFAFFFAGHDTTAGTASFALYELARNPKVQTRLRDEIEKAVEKNKGLTYDAVKDITYLQWIILEITRMYPVLGVIKRTSAKPYKFDNFDIPVGTEIIIPTRALHYDPKYFKNPNVFDPERFADGN…
mRNA2061	CYP397C1	Clan 3	MLTVTLFCVLFALSWYFLSRRFSYWRRHGIEEWKASSIFGNFSQVFLSKGSEVDVADDFYGRLKGRFGGYYFLWKPIMLIKDPELMKNILVTDFDHFADRPRFMNFYSTDVVLKSLFFIEVEDWRPRRASFTRLFTPKRLKKVALQSVKVTQEHVFENEIDLVKDLTKITIDIFSTSFLGIEIKDQSCFIEAFNLFNFLGISDSLKALLYSLHPKIFNLLKLKSLNQNVYKLFSEVVEDVIAEREKQKTDNDDFFDFLIQCKNGKVEDFKGMTQDEIVAHFFIFFFGGFDTTSLTSSYLLYELSRHEDIQKKLRKEIEESAKSGRSSHGTSIPELCRSRNLKNVSGIRCFEKGMHETVRDRRVPSS
mRNA13252	CYP398B1	Clan 3	MLLEVVLLIPAIWLALFFWWTRKYDHWSKVGIAFVKGSFPYGSVKDVFYGKENLGDFSMKICKQFPNEKLIGFYSFQNPMLIVNDPELVRDVMVKDFNSFAISGFEVHESVDPMIALNPFGLSGEKWKLFRGFLTSSQSISKLKSMVNPISKSSKNFVKFISNSPGQEINIRELIRYFTVDAVASCAFSSQCNSFEDPQNPLAHETNDTMFTNNRAITAAFFGPWVSYLTRDRLVSKVAENFFVAFAQRMFKDRKGLNSPPNDLIQSIFAHNEKCLKEGKKPMSYKEIAATLMAFFLDGTDSVSLAFGNALFHIALDQKVQEKLRDEIKKNGNSIEDFDYEKVNSMEYIEMVLWGTFFFIPKSFYRPCSNTIIEVFLNFLISLENARVNSTISVIHRLC…
mRNA3212	CYP399A4	Clan 3	MIFMIFAIFAVFSLFLVWEYKVTYWKRRRIPSLQALFPFGNIGDIVRIKKTIGEVYDDIYWKFRDEPVVGFYQFAKPSLMIRDPVLIKSVFTTNFASFNGNDYYVDPKIDPILGLNPFNLVGDEWIKARGVVTTSLTPSKIKKMIEQIHNICNNLKFHLKENKEEYLECYDVYGKFTTDVIGTCAYGLDSRALSDPNSKLREVSMKIFNTSITGNIALMCALYSQTAGKLLKYKIISEEATSYFEGIIKEACEQRMRNNISRNDYLQWLINANLEEKKDNDNPHNYQEMAAHCMTFFLDGFETTSILLGFIIYELSMNPEIQNQLRSEITKYGSTIEDFGYDNLQELEYLDLVIKETLRKHPPGTSMARSCNKSVTIENPEKDVKVYIEKGTSVTLPMY…
mRNA13256	CYP400A-fragment1	Clan 3	MERGVLDQLGTIEVSSHSASPYKPMLIIRDLDYIKDILVKDFNSFADNGFQTFASVDPLMALNPFCLRGPEWKVTRGIHSPSHSVAKLKLMVPGMVKTSMNFVKFLKEEQKSEICINEYARFYTTDAVASCAYSVENDSFFDKNSVFLKNTYGQLFTDTNLGALTAFFAPYTAFITRARNNPKESRKVLPLPWQRANRTAKARQFRWK
mRNA9902	CYP6DL3	Clan 3	MELDVLSFTFILALIYLLYYFGVSTYDYWKTRNVPFIKAKYPFFGNSFHLVFSLRSNIEEQKIRYDYFKGHRFGGFFSFRQPELFLRDAELIETILIKDFSYFYNRGNEPDTDLDPLSAHLVHLKDAQWKSVRNKLTPTFSSGKLKGMHDQLIECSDHLLDYMKPLKTFEARELMAKFATDVISCCAFGLNAEALNDSNSPMRAFGKRVFRTTFGARLRFMIRSHFPAILKLLRWRSIPLEMQKFFVETLNNTIAHREKNNIVRSDFLHLMNELRKNDTELLKSGKISEKEVVFDDKMFAANAFVFLVAGFETTATTMSYALYELSVNQDIQEKALKEIRETVKKYGNETTFEAVKEMNYLDQIVSETLRKYPPVTSVTRVASKPYKIPESSFVLEKNS…
mRNA5780	CYP6DL4	Clan 3	MDLISLLVIAILGFLLFLYFWGTWTYDYWEKRGVKYLKPKYPVFGTSFDNTFSRISAVEHTQNVYEYFKGHRFGGVFSLRTPTLFIRDPELIESILIKDFAYFYNRGVSVDPKLEPLSMHLVNLRDSAWKYLRNKLTPVFSSGKLKGMHQQVVESSDELVDYLSKYADRDSFNAKTVMSKYSIDIISSCAFGLSADGLKDESSKLVEVGRTIFVPTFKRRLRFAFRRQFPWILRLLNWKGMPQETQDFFVDTIKKTIQYREENNIVRHDFLHLMNELKKQEMHDIEVNPNIEKPIIFDDKILTANAFVFFIAGFETTASTLSFALYELALNPDKQEKLYQAVLHSVNKHGGETTFEAVKDAPYIEQVISETLRMHPPVTSLPRETVKPYQVPGTSLILP…
mRNA9901	CYP6DL5	Clan 3	MDPLLVTLGLAVIVLTALYFYGTSTYDFWRSIGVKYVEPKYPFLGTEYNRDFGLVVACEQQKEFYERFKDEKYYGQFSFRRPILVLRDPSMIEHVLIKDFSSLSTRPFSNDPKEKMSAHLLNFKGSAWKALRNKLTPVFSSGKLKGMHEQLLECSQEMVDYLMKFSDGTPFEAKTVMSRYSINVIASCAFGLSADGLNENSSLAKIGMSVFSNPSSRVWTLIRSYYPILFKLFKKRKSSTLNQNIFIDTIRNTLEYREKNNVHRPDFLHLLHELNKKDMKEVQENPNIERPLVFDENVFLANSFVFFVAGFETTATTLSFALYEMAVNQEVQERLYCEIKNKLIDYDDKFTYEALSSMSYLKQVISETLRKHSPAISVSRETSAPYKIPGTDKILPEGA…
mRNA10703	CYP6DM4	Clan 3	MFLETAIFASLAWIVYKFCFGVYDYWDKKGVPFIKGSFPFGSKLTLSFLTRYQGSVIQEYYNELSPHPFGGYYLYRKPVLLLRDPEVIKQIMVKDFSHFRSRFGKVNNKNDPLSLNLFSLEGDLWKSVRVKLTPTFTSGKLKMMYGFFDICSVEFLKALKKESSLGIVDIKEAVSRFTTDIIATCAFGLEVDSINNPNSEFRKIGQAVFPPKILLRRKCVTIFYNLFPSARKFLHLRTTSNHIENFLMDMTRDTIEYRAQNKIKRNDFLDLLLEIKDKMKDSGDSSFDMDLPMMMAQCFIFFAAGFETSSSVQSYALHELAMNENFQKKARAEIKEVLAKHDGKVTYQALQEMHYLEKVINETIRKYPTLPLLTRVCTKNWKSGGVEIDEGTLIHIPIY…
mRNA10685	CYP6DM5	Clan 3	MFLETAILAGLVWIVFKFCFGVYDYWDKRGVPFIKGSFPLGSKSTFSFLTRYQGSVIQEYYNELSPHPFGGYYLYRKPILLLRDPEVIKQIMVKDFSHFRSRFGDINNKNEPLSLNLFALEGDLWKSVRVKLTPTFTSGKLKMMYGFFDICSIEFLKALKKESSLGIVDIKEAVARFTTDIIATCAFGLEVDSINDPNSQFRKIGQQMFPGSMSLRRKLVNIFYNLFPSARKYLKLRIFSKEITEFLMNMTRDSIEYRQKNNVKRNDFLDLLIEVRDKMKDSGDSQPLDMDLAMMTAQCFVFFAAGFETSSSVQSYALHELAMNKEIQKKARTEIKEVLAKHDGKVTYQALQEMSYLEQVINESMRKYPTIPILTRLCSKNWKSPCGVEVDKGTLIHIP…
mRNA10680	CYP6DM6	Clan 3	MLVETILFTIVAWLLYKFFFDVYNHWEKKGIPHLKGTFPFGSKSTLDFLNRYQGRVIEEYYNELSPHPFGGFYLYRKPVLLLRDPEVIKQVMTKDFAHFRSRFGKIYKKSDPLMMHLFNLENDLWKSVRVKLTPTFTSGKLKMMYGFFDICSKEFLKVLKKEKETSGSFEVKDAVARFTTDLIATCAFGLEVDSINHPDSPFRQIGRSLFPSGITLRRKIILIINNLFPSLSKILLLRIISKKTEDFLMTVIGNTIDYRKKNSVKRHDFLDLLLEVQEKEDQNPSGEAQPLHMDLAMMTAQCFIFFAAGFETSSSVQSYALYELAVNQEMQDKVRSEIKKVLANHEGKVTYQALMEMPYLEQVINETVRKYPTIPILTRVCTKDWTSDSGYTIDKGTLV…
mRNA5162	CYP6HK7	Clan 3	MFLIFATIVIPVLFYVYATWTYDYWKKKRVAHPEPKALFGNIKDVALLRKFPGACHQEIYWNFPNEKFVGIYQLRIPSLLIRDPELIKQILVKDFEHFVDRGFHIDEEREPLTGHLVNLESQRWRLLRNKLTPAFSSGKIKNMFPLLVESAGKLNRFVKDELEKGENLEVRETTARFTTDVIGSVAFGLQFNAMSGDSVFREMGKKALQPTLYAAAAKAMRTFVPWLFDILKMRTFPNEINTFFTEVVRETISLREKTESKRNDFLQLMIQLKKADLEKSAGKDEILITENVIAAQAFVFFLAGFETSSTTISFCLYELSRNEQCQEEALEEINRLVEKHGSLTYEAVSEMNYLENILLETMRLYPPVSGLSRVCTKAYTIPGTDVNIEPGVMVVIPVY…
mRNA10749	CYP6XC1	Clan 3	MAFVVLALALIFTLYIWQGMKFNYWKERGVPYLKPLLFFGNTFDFIFSSKPIVEAANNIYQTFRDSRFGGIFLMLKPILVVTDPALIEEILVKDFSSFRNRGIVDDFDLNPLSKHLVYLKDEPWKYLRKKLTPVFSSGKLKEMYEELAKSSDILVERLSEKKTFEAKSVISEYSSDVIASCAFGLSKDDVEEKLALTNLHDNVEFFNGSLLMKITDLLLWCLPPFLHKFLTYKQLPQNIIESFIKTIRKTIKYREENNIVRNDFLHLMKELKKSEMQGAIEHPEITKACKNNFHIRTLLFYKFLVIFDEQVLTSNAYVFFTAGYETISSTISFALYELSVNPEVQEKLYADLKSTLDSHEGEITFKSINSSNYLDFTVSETLRKHAPIPFIPREVTKPY…
mRNA9746	CYP6XD1	Clan 3	MSETTWTLVAILGALVFYLYLDYKRKCDYWKKRGIAYFKSQGLVFGLLNEFTTKIPQCERFLSLYNAFPGEKYVGVYSLAKPMLLVKDPSTLERIMVKDFAHFVDHDVEKVDKSTIMNLGLFNLTGNEWRSYRTKISPTFTTGKLKNMFDELLPCVDNMISNMSCDVKEGIKSFAIDVTSSVIFGIEFKNKELRKEYKNVSENILKVGYIKGILFIISLQFPSFAKALGIKFLDEKHEKFFNDIIKQTFEQRSKGGYHRNDYVQLLLKLKEMGHVEVKHHPDDEYLKSDDVIVENFEVSDQILAAQAFQFITAGFEPIVNTMTLTMIELAQNKEIQEKARQEIKEKKAKHGGYTYAAVREMEYLEQCVNETLRMYPVVPFLLRYCQSDYQLNDRYTIEK…
mRNA9748	CYP6XD2	Clan 3	MSETTWTLVAILGAVVFYLYLDFKRKCEYWKKRGVAYPSSQGIFRSLMTALTTDVIQCERLLSLYNEFPGEKYVGVYSLAKPMLLVKDPSTLERIMVKDFAHFVDHDVDKVDKSTILNLGLFNLNGNEWRSYRTKISPTFTTGKLKNMFDELLPCMENMIKDIQEKSYDVKDAIMTYAIDVTSSVVFGIEFKNEELRKEYKHVSENMFKMGYIKGIMMMFASQFPSLAKAFGIKFMEEKHERFFNDIIKQTFEQRSKGGYHRNDYVQLLLKLKEMGHVEVKHHPDDEYLKSDDVIVENYEVSDQILAAQAFQFITAGFEPIVNTMTSTLIELAQNKKIQEKARQEIKEKKAKHGGYNYAALREMEYLEQCVNESLRKHPTLPFLMRNCLGNYQLNDKYT…
mRNA3215	CYP3089A4	Clan 3	MILSVALFFVAAALYFWLTKNYNYWKNQNVPYLKPILPFGNVLDLILMRRTTGEFYRDVYRNFPNLPAGGFFKFTEPMLVLRDPEMIKTVMVKDFSKFQNNDFQVSKDVDPLLAINPFAIQGSEWKNIRAIQLPAQSLSKVKSMVPDMINCSKQMAKKVSGCYTGDTVAACAFGLKSDSFSKEEEAFGAVTSGEVFGSNYWDNLSILCAMLAPSLGKLLKLRVIHKDVEDYFVNVINAASEYRLKNKVTRNDFLQQLIDTNSESPTGKPVYSNLEMAGHCMTFYMDGYETTSILLSFTLYELALHPEIQEELREEILSISSDIHEFDTANVHHMTYLDNVISESLRLHPPIQSVTRVCTESTSIYSSEGKEYKIKKGMSVVIPIYALHTDPEYFEDPEE…
mRNA13530	CYP15A1	Clan 2	MWQVFVSLVLILFILYIILDTKKPFDYPPGPPWLPIIGNYHIFFKLYREVEFTHLVWAKLSKLYGPLTGLRLGRDRLVIASDNKTIREILTREEFDARPDGFFFRLRSFGQRYGIVFVEGDFFNEHKKFCMKHLKSFGLNRSIMESRISVETSDLIAAIKRDCSEGITVPNILGISVVNGLWSMVAGERFKVGDPRPAELLNLINLSFRLQDMSGGLLNQMPFLRFIMPELSSFNKLQLVLNTLNKFLLELINDHKKTMMSFENRDLIDAYLNEIEKKRETFTEKQLIVLLLDLFFAGAETTQSTLGYAILILLHFPEWQKKLQDEIDSVCGSKVPEFQDKARLIYLEAFFMELQRFTNVTPTTVSHRATKDAYVNGFRIPTDTVILANIYCMHMDKNY…
mRNA13318	CYP18A1	Clan 2	MSTSRILNLLSNYLDTRTSLVFLLVLILVKIASKYYTAIKRLPPGPWGLPVFGYLPFLKSDAHVHFGELAKTYGGIFSLKLGNQFFVVLSDYKIIRDAFRREDFTGRPDTEFSNILEGYGIINSDGKLWKDQRKFLHDKLRKFGMTYSGQNKDQMEARIMKEVEVFLKTLTKEKDTDTDLNPILCTSISNVICDLVMSVRFNQKDAKFTRFMNLIAEGFRLFGSLSYANFFPIMRYLPGLQEVVKKIAQNRNEMAEFFQETVDSHRESFDSGNMRDILDNYLLEIDHAKAVGFEKELFDGKQHDRQMQQIIGDLFSAGMETIKTTLLWAIIYMLHEPEVAKNVREELDNVVGRGRLPRLEDRPYLPYTEATILEVLRISSIVPLGTTHAAKREVQLAGY…
mRNA13532	CYP305A31	Clan 2	MDILTLLLFTVLILVLIKFSFKRSNYPPGPTKIPFLGNGALVKKYTRRYGCLHAALIELCKVYETDILSLKLGRDNVVVVQKRSLVEEVFVRDVFQGRPNTFFIKLRSMGTRKGITMTDGPLWKEQRAFALKHMHSLGLGKSKTDYLINQEVEELFKKLKDGKRGNLKNEITKCMLNVLWAIVTGGKFASEETLEGLVGLMSERAKAFDMSGGILSQFPWIRFIAPEWSGYNIITRLNKKFQNMIHEIIDEHKKTYKEDTTRDFIDAFLHEMYQNNNNAYFTEDQLIMVCMDFFIAGSETVSSTLDFMLLHMIVFPEIQQKVQNEIDSVLEKGRPILTFDRSQLTYTDAMISESQRLSHIIPILGPKRVLSETSLGGYTIDKDTIVFVNAVPLAKNPEE…
mRNA13319	CYP306A1	Clan 2	MEIVIVLMALLCLLYTYLKFKRLPPGPWGLPILGYLPWINRTKPYLTLTELAEKYGPIYSMSMGSVLTVVLSDPQLIREALSRDVFTARADLYLTHGMMEGYGLVASEGDKWKEQRRFVASFLKGLGVVKVGSKRAVMEERILAGLREAIKMIVDLKEKPTNPNDILLHSLGNVINSIVFGKMWSYDDEEWVWLRERLKEGVKLIGVAGPINFLPFLRWWPGYGSSLRYLVEGKRMTHRLYQKIADEKEEGEDLLSSYKNAINKNSGKFFDRKQMYHVLADMFGAGSDTSLTTVRWFILFMASNPTIQKKLHKEIDLVLGQRKEICLSDMEFMPYTLASLYEAQRIRSIVPLGIPHGTWEKTTLAGYEIPPQTMILPLQWAIHMNPKEFFNPEEFRPER…
mRNA5285	CYP307B1	Clan 2	MKVCPRIDFWCDGDEVSHRKWSPRDANTSLKVEHLKKMEGFYLSSTSYLLLAALVLIVLGLAGDKFIRRRKKKSEGPLGVSAPGPKPWPVIGSLHLLGGYEIPYQAFDNLSKKYGPVFSIKLGQEKCLVISNLEHTKEVLFSKGDHFDGRPNFTRYHELFGGDKQNSLAFCDWSDTQKTRRDMLKDHTFPKAFTERFKTLDILINEELHELCSMINEGTTAIKPLISQACANVFMSYFCSTRFNFDDEGFKKLIKNFDEVFYEVNQGYAADFLPWLVPFYIGNLRKLKKTGKEIKEFMIERVIQKRLESWVAGQDEDDYVDSLISHVQGSKATMSLDTALFALEDIVGGHSAVANFIVKILGFISQEPEVQENIQKEADTVLCGRDVTLSERNSMPYTE…
mRNA8594	CYP394A2P, likely pseudogene, two gaps	-	MLKFRLVSNVLKSIKGRRSHSVKEASKAEEECEERLQTDDLFFASENFPFTTLPQSDQIFPKAKPTLLDPLIDETLRVDKSGVCAVPFSQIPTLGGSNWIKMCNLFGNYLPNFEGQLGRVYPFKTLFNFCGPLVRIVTPQKNSVVLLCKPKHIASIQKYDGVHPLISVIDSIEDYRENNLSISMPQXXXXXXXXXXXXXXXXXXXXXNYVIRDHSSQVPDNYNAELILWSLKSFSAIIFGRDAEYKEDGYKKIVSTLIEIXXXXXXXXXXXXXXXXXXXXXNLVMAHEIAYHKDEHFADAGKFEPRRWIRRTSKLIDPLEVMPFSHRQHPIIKELAYRQISILVAHTAKEKLPNAMYGP

## Sheet: 6. Ryanodine
mRNA13234	MADSEGGSEQDDVSFLRTEDMVCLSCTATGERVCLAAEGFGNRHCFLENIADKNIPPDLSTCVFVIEQALSVRALQELVTAAGTEEAQDSLGKGTGSGHRTLLYGNAILLRHQNSSMYLACLSTSSSHDKLSFDVGLQEHSQGEACWWTVHPASKQRSEGEKVRVGDDLILVSVATERYLHTTKENDQSIVNASFHVTHWSVQPYGTGISKMKYVGYVFGGDVLRFFHGGDECLTIPSTWTSEAGQNVVVYEGGSVLSQARSLWRLELARTKWSGGFINWYHPMRIRHLTTGRYLGVNEANELHLITREEATTALSTFILRQEKDDQKVIMEDKDLEVIGAPIIKYGDSTVLVQHSESGLWVTYKSFETKKKGVGKVEEKQAVLHEEGKMDDGLDFSRS…
